# Supplementary material for: Expression Profiling of Primary and Metastatic Ovarian Tumors Reveals Differences Indicative of Aggressive Disease
Source: PLoS One. 2014 Apr 14;9(4):e94476. doi: 10.1371/journal.pone.0094476 (PMC3986100; doi:10.1371/journal.pone.0094476)
Supplement: Table S2 — Primer sequences used for qPCR. (XLSX) [file pone.0094476.s006.xlsx]

## Sheet: Sheet1
Table S2. Primer sequences used for qPCR
Gene Symbol	Refseq ID	Forward Primer	Reverse Primer
MTSS1	NM_014751	gaagctgaagaccaggaacg	agtatcccttgggctcaggt
TDG	NM_003211	cccaagaggatgcaaagaag	aagccacaaggttcactgct
PROM1	NM_006017	gttcccattggatgcatttc	tgttcagcacactccacaca
PTPRC	NM_002838	ggtttccacattcgagcaat	ttctgagcagggtaggtgct
CD44	NM_000610	aaggtggagcaaacacaacc	actgcaatgcaaactgcaag
SST	NM_001048.3	ccaaccagacggagaatgat	ccatagccgggtttgagtta
TSPAN8	NM_004616	gattgctgtaggtgccatca	ggagcaggatcagaagcaag
APOC1	NM_001645	cctccagcaaggattcagag	caagacgatcgacagaacca
ADAM23	NM_003812	caaagtccgtggtcaacctt	aggacaaccctggtgttgag
ATR	NM_001184	tgtttgaagacggtgtgctc	tgcagtaaatggcacaaagc
ORC4L	NM_002552	ttctcaccggcagatacactt	aaaccttgtctggaaactctgc
CCNB2	NM_004701	agactctgtacatgtgcgttggca	tggaagccaagagcagagcagtaa
ITGA11	NM_001004439	tcacacagttaccagaatgcccga	aagccgtggaagatgtagatggca
ITGA3	NM_002204	ggtcagggtcagaagaccag	tgtggtaggtctgccagtca
RAD17	NM_002873	cccaaggagacatggaagaa	ctgattagcaggctggcttc
Cell Cycle Checkpoint
CHEK1	NM_001114122	aatttcaaccttcggtgtgc	gtcccagtcttccacaaagg
PSMA4	NM_001102668	acattggctgggataagcac	gctgcagcgctattatttcc
CCNB2	NM_004701	agactctgtacatgtgcgttggca	tggaagccaagagcagagcagtaa
RAD51	NM_002875	atcatcgcccatgcatcaacaacc	agtctttggcatctcccactccat
Apoptosis Regulators
FAS	NM_000043	caagggattggaattgagga	caggccttccaagttctgag
ANXA1	NM_000700	aggtcaccttgaggaggttg	cttcatggcagcacgaagt
SNCA	NM_000345	tgacaaatgttggaggagca	ctccctccactgtcttctgg
