# Supplementary material for: Expression Profiling of Primary and Metastatic Ovarian Tumors Reveals Differences Indicative of Aggressive Disease
Source: PLoS One. 2014 Apr 14;9(4):e94476. doi: 10.1371/journal.pone.0094476 (PMC3986100; doi:10.1371/journal.pone.0094476)
Supplement: Table S4 — A. Kegg Gene Sets up-regulated in Mets. B. Kegg Gene Sets down-regulated in Mets. C. Reactome Gene Sets up-regulated in Mets. D. Reactome Gene Sets down-regulated in Mets. E. Transcription factor target gene sets up-regulated in Mets. F. Transcription factor target gene sets down-regulated in Mets. (XLSX) [file pone.0094476.s008.xlsx]

## Sheet: Up in Mets Kegg
Table S4A. Kegg Gene Sets up-regulated in Mets
Gene Set	SIZE	ES	NES	NOM p-val	FDR q-val
KEGG_ECM_RECEPTOR_INTERACTION	71	-0.763878	-3.01729	0	0
KEGG_FOCAL_ADHESION	163	-0.572808	-2.55007	0	0
KEGG_CELL_ADHESION_MOLECULES_CAMS	95	-0.557047	-2.29955	0	0
KEGG_PRIMARY_IMMUNODEFICIENCY	25	-0.71983	-2.2727	0	0
KEGG_COMPLEMENT_AND_COAGULATION_CASCADES	39	-0.656074	-2.25432	0	0
KEGG_HEMATOPOIETIC_CELL_LINEAGE	58	-0.584143	-2.18951	0	0
KEGG_CYTOKINE_CYTOKINE_RECEPTOR_INTERACTION	162	-0.476448	-2.10083	0	0.00030954
KEGG_CALCIUM_SIGNALING_PATHWAY	130	-0.469822	-2.04133	0	0.000813546
KEGG_NATURAL_KILLER_CELL_MEDIATED_CYTOTOXICITY	93	-0.495447	-2.01443	0	0.0013326
KEGG_REGULATION_OF_ACTIN_CYTOSKELETON	163	-0.454457	-2.00524	0	0.00154636
KEGG_BLADDER_CANCER	36	-0.586676	-1.98563	0	0.00189247
KEGG_AUTOIMMUNE_THYROID_DISEASE	24	-0.636023	-1.98559	0	0.00173476
KEGG_FC_GAMMA_R_MEDIATED_PHAGOCYTOSIS	77	-0.499225	-1.97482	0	0.00192673
KEGG_LEUKOCYTE_TRANSENDOTHELIAL_MIGRATION	89	-0.474641	-1.9242	0	0.00384744
KEGG_MELANOMA	58	-0.512097	-1.90934	0	0.00431414
KEGG_INTESTINAL_IMMUNE_NETWORK_FOR_IGA_PRODUCTION	32	-0.572431	-1.88795	0	0.00558722
KEGG_ANTIGEN_PROCESSING_AND_PRESENTATION	53	-0.508222	-1.88236	0	0.0058805
KEGG_VIRAL_MYOCARDITIS	52	-0.508967	-1.87332	0	0.00614642
KEGG_PATHWAYS_IN_CANCER	278	-0.390522	-1.8523	0	0.00735443
KEGG_DILATED_CARDIOMYOPATHY	75	-0.450882	-1.79532	0	0.0134785
KEGG_ALLOGRAFT_REJECTION	23	-0.581698	-1.7713	0.00536673	0.0169632
KEGG_PPAR_SIGNALING_PATHWAY	52	-0.479207	-1.76547	0	0.017557
KEGG_HYPERTROPHIC_CARDIOMYOPATHY_HCM	68	-0.453227	-1.74541	0.00306279	0.0211764
KEGG_NEUROACTIVE_LIGAND_RECEPTOR_INTERACTION	132	-0.408391	-1.74412	0	0.0204729
KEGG_B_CELL_RECEPTOR_SIGNALING_PATHWAY	64	-0.455701	-1.73825	0.00160256	0.0206416
KEGG_GRAFT_VERSUS_HOST_DISEASE	28	-0.537317	-1.73071	0.00686106	0.0212723
KEGG_MAPK_SIGNALING_PATHWAY	222	-0.365533	-1.69154	0	0.0311739
KEGG_AXON_GUIDANCE	109	-0.402217	-1.67527	0.00468019	0.0345335
KEGG_ACUTE_MYELOID_LEUKEMIA	49	-0.460065	-1.67429	0.00464396	0.0334858
KEGG_CHEMOKINE_SIGNALING_PATHWAY	144	-0.383985	-1.67166	0	0.0333079
KEGG_ARRHYTHMOGENIC_RIGHT_VENTRICULAR_CARDIOMYOPATHY_ARVC	61	-0.442887	-1.66972	0.00476191	0.0326176
KEGG_ENDOCYTOSIS	134	-0.383293	-1.65975	0.00301659	0.0337081
KEGG_TGF_BETA_SIGNALING_PATHWAY	73	-0.413797	-1.62819	0.00941915	0.0426883
KEGG_VASCULAR_SMOOTH_MUSCLE_CONTRACTION	98	-0.393968	-1.62711	0.00307692	0.0416907
KEGG_LEISHMANIA_INFECTION	49	-0.451013	-1.61949	0.00474683	0.042946
KEGG_T_CELL_RECEPTOR_SIGNALING_PATHWAY	85	-0.396261	-1.60474	0.0015625	0.0467909
KEGG_CHRONIC_MYELOID_LEUKEMIA	65	-0.411628	-1.58732	0.00628931	0.0531257
KEGG_GLIOMA	55	-0.426049	-1.58448	0.013289	0.0530578
KEGG_TOLL_LIKE_RECEPTOR_SIGNALING_PATHWAY	71	-0.404511	-1.57549	0.0154799	0.0555606
KEGG_TYPE_I_DIABETES_MELLITUS	31	-0.472481	-1.57158	0.0245902	0.0562228
KEGG_JAK_STAT_SIGNALING_PATHWAY	101	-0.383893	-1.56967	0.00768049	0.0558069
KEGG_LYSOSOME	99	-0.377563	-1.55407	0.00721501	0.0613145
KEGG_ASTHMA	16	-0.560192	-1.52821	0.0555556	0.0738236
KEGG_PROSTATE_CANCER	74	-0.384379	-1.52103	0.0192308	0.0760418
KEGG_ADIPOCYTOKINE_SIGNALING_PATHWAY	56	-0.39728	-1.49272	0.0420032	0.0911444
KEGG_NOTCH_SIGNALING_PATHWAY	36	-0.441579	-1.49091	0.0439932	0.090492
KEGG_BASAL_CELL_CARCINOMA	48	-0.408888	-1.4716	0.0424837	0.101467
KEGG_GLYCOSPHINGOLIPID_BIOSYNTHESIS_GLOBO_SERIES	10	-0.598928	-1.44831	0.0872727	0.116284
KEGG_GLYCOSAMINOGLYCAN_BIOSYNTHESIS_KERATAN_SULFATE	12	-0.547223	-1.3972	0.0994575	0.159469
KEGG_ABC_TRANSPORTERS	31	-0.423399	-1.3937	0.0750853	0.159709
KEGG_GAP_JUNCTION	61	-0.368461	-1.38944	0.0607029	0.160809
KEGG_GLYCOLYSIS_GLUCONEOGENESIS	43	-0.388856	-1.38438	0.0698835	0.162927
KEGG_ARACHIDONIC_ACID_METABOLISM	41	-0.393162	-1.38356	0.0720131	0.160628
KEGG_FC_EPSILON_RI_SIGNALING_PATHWAY	63	-0.359568	-1.36788	0.0648734	0.173156
KEGG_PANCREATIC_CANCER	62	-0.34742	-1.33598	0.0901771	0.206282
KEGG_THYROID_CANCER	25	-0.430523	-1.32485	0.137324	0.215132
KEGG_WNT_SIGNALING_PATHWAY	133	-0.300767	-1.30826	0.058651	0.232221
KEGG_TYROSINE_METABOLISM	28	-0.407911	-1.30611	0.135043	0.230988
KEGG_CYTOSOLIC_DNA_SENSING_PATHWAY	34	-0.388582	-1.29705	0.142415	0.239225
KEGG_SMALL_CELL_LUNG_CANCER	75	-0.327025	-1.29355	0.103077	0.239343
KEGG_APOPTOSIS	73	-0.329545	-1.28565	0.101721	0.24615
KEGG_PRION_DISEASES	27	-0.404203	-1.27839	0.161179	0.252417
KEGG_MATURITY_ONSET_DIABETES_OF_THE_YOUNG	12	-0.482965	-1.26469	0.191682	0.267682
KEGG_GLYCEROLIPID_METABOLISM	29	-0.381848	-1.25553	0.183362	0.276948
KEGG_MELANOGENESIS	88	-0.303691	-1.2479	0.122257	0.283804
KEGG_ENDOMETRIAL_CANCER	42	-0.352358	-1.24238	0.152104	0.287662
KEGG_PANTOTHENATE_AND_COA_BIOSYNTHESIS	12	-0.482982	-1.24051	0.2	0.285852
KEGG_NON_SMALL_CELL_LUNG_CANCER	47	-0.345509	-1.22835	0.190556	0.29973
KEGG_FATTY_ACID_METABOLISM	35	-0.36199	-1.2277	0.168634	0.296357
KEGG_SYSTEMIC_LUPUS_ERYTHEMATOSUS	82	-0.307205	-1.21934	0.152308	0.304969
KEGG_PHOSPHATIDYLINOSITOL_SIGNALING_SYSTEM	56	-0.321048	-1.19292	0.204583	0.342216
KEGG_NICOTINATE_AND_NICOTINAMIDE_METABOLISM	18	-0.409346	-1.18177	0.238676	0.35548
KEGG_GNRH_SIGNALING_PATHWAY	86	-0.284592	-1.17167	0.204687	0.367598
KEGG_LONG_TERM_POTENTIATION	54	-0.310485	-1.1631	0.227345	0.377306
KEGG_GLYCOSAMINOGLYCAN_DEGRADATION	17	-0.402732	-1.12562	0.296796	0.440091
KEGG_PATHOGENIC_ESCHERICHIA_COLI_INFECTION	39	-0.328364	-1.1228	0.306759	0.439555
KEGG_TYPE_II_DIABETES_MELLITUS	35	-0.327849	-1.11979	0.305141	0.439955
KEGG_RETINOL_METABOLISM	28	-0.350759	-1.11857	0.283388	0.436683
KEGG_O_GLYCAN_BIOSYNTHESIS	22	-0.373515	-1.10758	0.335088	0.451579
KEGG_HEDGEHOG_SIGNALING_PATHWAY	50	-0.296284	-1.09034	0.320405	0.478867
KEGG_OTHER_GLYCAN_DEGRADATION	15	-0.399435	-1.08984	0.341284	0.473898
KEGG_NOD_LIKE_RECEPTOR_SIGNALING_PATHWAY	43	-0.30914	-1.08263	0.331179	0.48186
KEGG_TRYPTOPHAN_METABOLISM	27	-0.331248	-1.06788	0.36413	0.505416
KEGG_OLFACTORY_TRANSDUCTION	102	-0.255328	-1.06664	0.326379	0.501943
KEGG_RENAL_CELL_CARCINOMA	59	-0.283207	-1.06318	0.352657	0.502705
KEGG_LONG_TERM_DEPRESSION	51	-0.28388	-1.04866	0.381342	0.525821
KEGG_COLORECTAL_CANCER	52	-0.290477	-1.04557	0.364865	0.526565
KEGG_P53_SIGNALING_PATHWAY	56	-0.277415	-1.03455	0.401587	0.542361
KEGG_NEUROTROPHIN_SIGNALING_PATHWAY	104	-0.249266	-1.03198	0.425532	0.541209
KEGG_VEGF_SIGNALING_PATHWAY	62	-0.269082	-1.0195	0.436187	0.55913
KEGG_GLYCOSAMINOGLYCAN_BIOSYNTHESIS_CHONDROITIN_SULFATE	15	-0.363626	-1.01438	0.447842	0.562856
KEGG_METABOLISM_OF_XENOBIOTICS_BY_CYTOCHROME_P450	36	-0.303384	-1.01307	0.443316	0.559377
KEGG_STARCH_AND_SUCROSE_METABOLISM	20	-0.336617	-1.01137	0.42132	0.556561
KEGG_INSULIN_SIGNALING_PATHWAY	107	-0.244314	-1.00568	0.442922	0.561885
KEGG_HISTIDINE_METABOLISM	18	-0.340082	-0.98225	0.452614	0.601167
KEGG_STEROID_HORMONE_BIOSYNTHESIS	23	-0.310412	-0.953321	0.517304	0.654884
KEGG_ERBB_SIGNALING_PATHWAY	74	-0.237992	-0.933696	0.600316	0.688686
KEGG_ADHERENS_JUNCTION	60	-0.236028	-0.905797	0.619195	0.740029
KEGG_SPHINGOLIPID_METABOLISM	30	-0.278087	-0.902778	0.602627	0.738505
KEGG_VALINE_LEUCINE_AND_ISOLEUCINE_BIOSYNTHESIS	10	-0.3704	-0.90245	0.57672	0.731766
KEGG_AMYOTROPHIC_LATERAL_SCLEROSIS_ALS	39	-0.256353	-0.895192	0.638842	0.738902
KEGG_INOSITOL_PHOSPHATE_METABOLISM	38	-0.258333	-0.878771	0.630584	0.764375
KEGG_ALZHEIMERS_DISEASE	137	-0.199076	-0.862236	0.749271	0.789207
KEGG_VASOPRESSIN_REGULATED_WATER_REABSORPTION	30	-0.251752	-0.82331	0.736487	0.85439
KEGG_MTOR_SIGNALING_PATHWAY	38	-0.23465	-0.80068	0.766667	0.88591
KEGG_EPITHELIAL_CELL_SIGNALING_IN_HELICOBACTER_PYLORI_INFECTION	52	-0.212456	-0.773228	0.835218	0.92197
KEGG_TIGHT_JUNCTION	98	-0.187377	-0.769704	0.899536	0.9189
KEGG_PHENYLALANINE_METABOLISM	12	-0.299305	-0.765197	0.759358	0.917092
KEGG_DRUG_METABOLISM_OTHER_ENZYMES	22	-0.245965	-0.736525	0.818803	0.94615
KEGG_ALDOSTERONE_REGULATED_SODIUM_REABSORPTION	28	-0.221444	-0.711747	0.875208	0.965725
KEGG_DORSO_VENTRAL_AXIS_FORMATION	16	-0.256761	-0.7074	0.817052	0.961606
KEGG_FRUCTOSE_AND_MANNOSE_METABOLISM	25	-0.22749	-0.706128	0.863717	0.954357
KEGG_GALACTOSE_METABOLISM	17	-0.245842	-0.692585	0.890288	0.95848
KEGG_GLYCOSPHINGOLIPID_BIOSYNTHESIS_LACTO_AND_NEOLACTO_SERIES	18	-0.228201	-0.647863	0.904348	0.984172
KEGG_VIBRIO_CHOLERAE_INFECTION	44	-0.180733	-0.640606	0.969595	0.979904
KEGG_PORPHYRIN_AND_CHLOROPHYLL_METABOLISM	20	-0.20778	-0.614343	0.930272	0.983738
KEGG_PROXIMAL_TUBULE_BICARBONATE_RECLAMATION	18	-0.202655	-0.57455	0.945205	0.989689
KEGG_SNARE_INTERACTIONS_IN_VESICULAR_TRANSPORT	27	-0.172704	-0.548048	0.979021	0.987869

## Sheet: Down in Mets Kegg
Table S4B. Kegg Gene Sets down-regulated in Mets
NAME	SIZE	ES	NES	NOM p-val	FDR q-val
KEGG_NITROGEN_METABOLISM	18	0.65628	2.00182	0.00225734	0.0184066
KEGG_PROPANOATE_METABOLISM	25	0.591766	1.99806	0	0.0099934
KEGG_RNA_DEGRADATION	44	0.512443	1.98137	0	0.00782348
KEGG_UBIQUITIN_MEDIATED_PROTEOLYSIS	101	0.414787	1.85978	0	0.0236642
KEGG_VALINE_LEUCINE_AND_ISOLEUCINE_DEGRADATION	39	0.50321	1.85136	0.00275482	0.0201636
KEGG_TERPENOID_BACKBONE_BIOSYNTHESIS	11	0.657338	1.75495	0.0043956	0.0442342
KEGG_CELL_CYCLE	105	0.374798	1.71415	0	0.0543464
KEGG_SPLICEOSOME	88	0.374016	1.68741	0	0.0596185
KEGG_GLYCOSYLPHOSPHATIDYLINOSITOL_GPI_ANCHOR_BIOSYNTHESIS	19	0.543632	1.64866	0.00896861	0.0735533
KEGG_CITRATE_CYCLE_TCA_CYCLE	29	0.475207	1.64524	0.0121359	0.0682186
KEGG_BIOSYNTHESIS_OF_UNSATURATED_FATTY_ACIDS	14	0.563062	1.63458	0.0330969	0.066925
KEGG_PEROXISOME	59	0.398976	1.63351	0.00278552	0.0618729
KEGG_NUCLEOTIDE_EXCISION_REPAIR	39	0.415997	1.53753	0.03	0.120785
KEGG_HOMOLOGOUS_RECOMBINATION	26	0.446001	1.52975	0.0222222	0.119502
KEGG_BASAL_TRANSCRIPTION_FACTORS	27	0.42957	1.49604	0.0351759	0.14083
KEGG_PROTEASOME	39	0.4014	1.48648	0.0503778	0.140199
KEGG_OOCYTE_MEIOSIS	83	0.333093	1.4569	0.0196078	0.158208
KEGG_BUTANOATE_METABOLISM	22	0.447781	1.44537	0.0508906	0.160442
KEGG_PARKINSONS_DISEASE	95	0.323558	1.43585	0.0176471	0.161656
KEGG_GLUTATHIONE_METABOLISM	38	0.392811	1.42585	0.0592593	0.164107
KEGG_RNA_POLYMERASE	24	0.435897	1.42306	0.0807601	0.159021
KEGG_PYRIMIDINE_METABOLISM	76	0.333921	1.42287	0.0248619	0.152056
KEGG_PROGESTERONE_MEDIATED_OOCYTE_MATURATION	66	0.331285	1.39048	0.0189189	0.175707
KEGG_OXIDATIVE_PHOSPHORYLATION	99	0.304086	1.38517	0.0157729	0.173955
KEGG_MISMATCH_REPAIR	20	0.427064	1.35247	0.108434	0.202465
KEGG_CYSTEINE_AND_METHIONINE_METABOLISM	20	0.428312	1.33863	0.12037	0.212121
KEGG_DNA_REPLICATION	29	0.381891	1.31738	0.119512	0.230274
KEGG_PENTOSE_AND_GLUCURONATE_INTERCONVERSIONS	10	0.520379	1.31287	0.15991	0.227831
KEGG_PYRUVATE_METABOLISM	32	0.357666	1.27405	0.153465	0.269669
KEGG_AMINOACYL_TRNA_BIOSYNTHESIS	26	0.375925	1.26942	0.147465	0.267643
KEGG_BETA_ALANINE_METABOLISM	17	0.407813	1.25824	0.188544	0.274495
KEGG_PROTEIN_EXPORT	19	0.40961	1.25221	0.17552	0.274288
KEGG_TASTE_TRANSDUCTION	32	0.34742	1.24893	0.146341	0.270991
KEGG_PRIMARY_BILE_ACID_BIOSYNTHESIS	12	0.453309	1.24289	0.216279	0.271065
KEGG_LYSINE_DEGRADATION	36	0.325611	1.23002	0.150127	0.281529
KEGG_NON_HOMOLOGOUS_END_JOINING	10	0.467632	1.22423	0.221978	0.28196
KEGG_ARGININE_AND_PROLINE_METABOLISM	39	0.313999	1.18006	0.2	0.340814
KEGG_DRUG_METABOLISM_CYTOCHROME_P450	37	0.319099	1.17955	0.19708	0.33266
KEGG_REGULATION_OF_AUTOPHAGY	10	0.452172	1.17027	0.27088	0.339589
KEGG_RIBOSOME	75	0.269883	1.14263	0.19571	0.376995
KEGG_HUNTINGTONS_DISEASE	143	0.234726	1.13555	0.146199	0.380054
KEGG_ONE_CARBON_POOL_BY_FOLATE	16	0.385001	1.12559	0.298368	0.388754
KEGG_PENTOSE_PHOSPHATE_PATHWAY	19	0.344994	1.06193	0.377315	0.503747
KEGG_ETHER_LIPID_METABOLISM	25	0.310721	1.05959	0.386308	0.497186
KEGG_FOLATE_BIOSYNTHESIS	11	0.39001	1.05477	0.383028	0.49597
KEGG_GLYOXYLATE_AND_DICARBOXYLATE_METABOLISM	12	0.373481	1.0257	0.408389	0.545722
KEGG_PURINE_METABOLISM	124	0.216105	1.00632	0.391026	0.57665
KEGG_GLYCINE_SERINE_AND_THREONINE_METABOLISM	26	0.254908	0.867085	0.660241	0.900619
KEGG_ALANINE_ASPARTATE_AND_GLUTAMATE_METABOLISM	25	0.261524	0.864501	0.687351	0.88778
KEGG_AMINO_SUGAR_AND_NUCLEOTIDE_SUGAR_METABOLISM	37	0.227136	0.862827	0.678392	0.873946
KEGG_GLYCOSAMINOGLYCAN_BIOSYNTHESIS_HEPARAN_SULFATE	21	0.270234	0.849683	0.683824	0.884865
KEGG_RIG_I_LIKE_RECEPTOR_SIGNALING_PATHWAY	39	0.227018	0.841077	0.712121	0.88546
KEGG_N_GLYCAN_BIOSYNTHESIS	36	0.227156	0.833703	0.731266	0.884062
KEGG_SULFUR_METABOLISM	11	0.291096	0.765366	0.781395	0.982254
KEGG_STEROID_BIOSYNTHESIS	16	0.256192	0.758511	0.804651	0.973354
KEGG_LINOLEIC_ACID_METABOLISM	17	0.248182	0.754325	0.802752	0.960843
KEGG_GLYCEROPHOSPHOLIPID_METABOLISM	51	0.189967	0.747109	0.928767	0.95303
KEGG_BASE_EXCISION_REPAIR	31	0.203098	0.717393	0.892938	0.969526
KEGG_SELENOAMINO_ACID_METABOLISM	19	0.211013	0.642723	0.917073	1
KEGG_ALPHA_LINOLENIC_ACID_METABOLISM	15	0.217289	0.642055	0.92439	0.991444
KEGG_CARDIAC_MUSCLE_CONTRACTION	54	0.148354	0.586668	0.994975	0.997088
KEGG_CIRCADIAN_RHYTHM_MAMMAL	10	0.204577	0.536579	0.985232	0.991776

## Sheet: Up in Mets Reactome
Table S4C. Reactome Gene Sets up-regulated in Mets
Gene Set	SIZE	ES	NES	NOM p-val	FDR q-val
REACTOME_INTEGRIN_CELL_SURFACE_INTERACTIONS	69	-0.704937	-2.64936	0	0
REACTOME_IMMUNOREGULATORY_INTERACTIONS_BETWEEN_A_LYMPHOID_AND_A_NON_LYMPHOID_CELL	53	-0.7223	-2.58652	0	0
REACTOME_SIGNALING_IN_IMMUNE_SYSTEM	255	-0.549977	-2.47574	0	0
REACTOME_PLATELET_DEGRANULATION	61	-0.650681	-2.39124	0	0
REACTOME_HEMOSTASIS	210	-0.532737	-2.3277	0	0
REACTOME_SIGNALING_BY_PDGF	57	-0.624986	-2.29306	0	0
REACTOME_PLATELET_ACTIVATION	123	-0.556254	-2.28966	0	0
REACTOME_FORMATION_OF_PLATELET_PLUG	140	-0.533745	-2.23513	0	0
REACTOME_CELL_SURFACE_INTERACTIONS_AT_THE_VASCULAR_WALL	77	-0.578373	-2.21949	0	0
REACTOME_COMPLEMENT_CASCADE	11	-0.869085	-2.11964	0	0.00027069
REACTOME_AXON_GUIDANCE	139	-0.493496	-2.0888	0	0.000568863
REACTOME_COLLAGEN_MEDIATED_ACTIVATION_CASCADE	19	-0.723429	-2.06895	0	0.000825469
REACTOME_NCAM1_INTERACTIONS	38	-0.626879	-2.06491	0	0.000901118
REACTOME_GENERATION_OF_SECOND_MESSENGER_MOLECULES	26	-0.66533	-2.04554	0	0.00103433
REACTOME_PLATELET_ADHESION_TO_EXPOSED_COLLAGEN	13	-0.805866	-2.03706	0	0.00107863
REACTOME_NCAM_SIGNALING_FOR_NEURITE_OUT_GROWTH	58	-0.558058	-2.03255	0	0.00118008
REACTOME_PEPTIDE_LIGAND_BINDING_RECEPTORS	97	-0.489187	-1.94609	0	0.00427374
REACTOME_GPCR_LIGAND_BINDING	218	-0.436226	-1.9453	0	0.00403631
REACTOME_CLASS_A1_RHODOPSIN_LIKE_RECEPTORS	150	-0.455995	-1.92894	0	0.00505751
REACTOME_PD1_SIGNALING	19	-0.663729	-1.91818	0.0016835	0.0054344
REACTOME_SEMAPHORIN_INTERACTIONS	57	-0.534474	-1.91681	0	0.0053882
REACTOME_PHOSPHORYLATION_OF_CD3_AND_TCR_ZETA_CHAINS	16	-0.692357	-1.90291	0	0.0064021
REACTOME_MUSCLE_CONTRACTION	35	-0.571955	-1.88958	0.00156006	0.0070851
REACTOME_SEMA4D_IN_SEMAPHORIN_SIGNALING	25	-0.613472	-1.86693	0.00336134	0.00943821
REACTOME_CELL_JUNCTION_ORGANIZATION	60	-0.494154	-1.82313	0.00322061	0.0158928
REACTOME_PLATELET_ACTIVATION_TRIGGERS	49	-0.517018	-1.81437	0	0.0169076
REACTOME_G_ALPHA_I_SIGNALLING_EVENTS	105	-0.448469	-1.81083	0	0.0172394
REACTOME_INNATE_IMMUNITY_SIGNALING	81	-0.462462	-1.80079	0	0.0182962
REACTOME_P130CAS_LINKAGE_TO_MAPK_SIGNALING_FOR_INTEGRINS	12	-0.703328	-1.78768	0.00344234	0.0208219
REACTOME_SMOOTH_MUSCLE_CONTRACTION	16	-0.650539	-1.77615	0	0.023717
REACTOME_TCR_SIGNALING	49	-0.501075	-1.76113	0.0031746	0.0269348
REACTOME_FGFR_LIGAND_BINDING_AND_ACTIVATION	21	-0.600798	-1.74006	0.00700525	0.031793
REACTOME_FRS2MEDIATED_CASCADE	21	-0.602174	-1.73691	0.00481541	0.0318941
REACTOME_PHOSPHOLIPASE_CMEDIATED_CASCADE	17	-0.632921	-1.73348	0.00881834	0.0317696
REACTOME_TRANSLOCATION_OF_ZAP70_TO_IMMUNOLOGICAL_SYNAPSE	15	-0.660695	-1.73095	0.00998336	0.0318789
REACTOME_CELLEXTRACELLULAR_MATRIX_INTERACTIONS	12	-0.681031	-1.71667	0.0108303	0.0358897
REACTOME_LIPOPROTEIN_METABOLISM	18	-0.616986	-1.71633	0.0104895	0.0350421
REACTOME_PHASE_1_FUNCTIONALIZATION_OF_COMPOUNDS	42	-0.496633	-1.70514	0.00324675	0.0376376
REACTOME_SEMA4D_INDUCED_CELL_MIGRATION_AND_GROWTH_CONE_COLLAPSE	21	-0.589876	-1.70192	0.0106195	0.037631
REACTOME_CHYLOMICRON_MEDIATED_LIPID_TRANSPORT	10	-0.701428	-1.69354	0.0126354	0.0394909
REACTOME_COSTIMULATION_BY_THE_CD28_FAMILY	51	-0.47595	-1.69221	0.00321543	0.0390767
REACTOME_DOWNSTREAM_EVENTS_IN_GPCR_SIGNALING	265	-0.367182	-1.67983	0	0.0426287
REACTOME_REGULATION_OF_INSULIN_LIKE_GROWTH_FACTOR_ACTIVITY_BY_INSULIN_LIKE_GROWTH_FACTOR_BINDING_PROTEINS	10	-0.713192	-1.66692	0.0114504	0.0467364
REACTOME_TOLL_LIKE_RECEPTOR_4_CASCADE	17	-0.594638	-1.64378	0.0254669	0.0563798
REACTOME_STRIATED_MUSCLE_CONTRACTION	22	-0.551436	-1.61205	0.0181818	0.0734105
REACTOME_G_ALPHA_Q_SIGNALLING_EVENTS	92	-0.408693	-1.60117	0.00434153	0.0784917
REACTOME_PECAM1_INTERACTIONS	12	-0.624715	-1.59244	0.0304114	0.0823244
REACTOME_CHEMOKINE_RECEPTORS_BIND_CHEMOKINES	33	-0.485758	-1.58082	0.014975	0.0885306
REACTOME_FURTHER_PLATELET_RELEASATE	21	-0.542672	-1.57784	0.0320856	0.0890079
REACTOME_INTEGRIN_ALPHAIIBBETA3_SIGNALING	18	-0.562548	-1.56862	0.0338078	0.0932319
REACTOME_VIRAL_DSRNA_TLR3_TRIF_COMPLEX_ACTIVATES_RIP1	10	-0.642311	-1.54044	0.046875	0.113952
REACTOME_P75NTR_SIGNALS_VIA_NFKB	12	-0.605565	-1.52486	0.061082	0.125379
REACTOME_PLATELET_AGGREGATION_PLUG_FORMATION	21	-0.518841	-1.52194	0.050173	0.125757
REACTOME_GRB2_SOS_PROVIDES_LINKAGE_TO_MAPK_SIGNALING_FOR_INTERGRINS_	12	-0.611843	-1.51963	0.0358362	0.125965
REACTOME_SHCMEDIATED_CASCADE	18	-0.548622	-1.51831	0.0585009	0.124808
REACTOME_CD28_DEPENDENT_PI3K_AKT_SIGNALING	13	-0.589892	-1.50126	0.0492958	0.138344
REACTOME_PHASE_1_FUNCTIONALIZATION	11	-0.618644	-1.50048	0.04363	0.136625
REACTOME_THROMBIN_SIGNALLING_THROUGH_PROTEINASE_ACTIVATED_RECEPTORS	22	-0.500825	-1.48992	0.0566038	0.145265
REACTOME_PI3K_CASCADE	31	-0.464928	-1.48627	0.0402685	0.146558
REACTOME_BASIGIN_INTERACTIONS	23	-0.496156	-1.46979	0.0405405	0.160676
REACTOME_DOWNSTREAM_TCR_SIGNALING	35	-0.447809	-1.46565	0.0540098	0.162878
REACTOME_REGULATION_OF_INSULIN_SECRETION_BY_FREE_FATTY_ACIDS	16	-0.526572	-1.44475	0.0729537	0.18375
REACTOME_MYD88_CASCADE	10	-0.604146	-1.43659	0.0806452	0.189817
REACTOME_ADHERENS_JUNCTIONS_INTERACTIONS	18	-0.506659	-1.42763	0.0751252	0.197517
REACTOME_HUMAN_TAK1_ACTIVATES_NFKB_BY_PHOSPHORYLATION_AND_ACTIVATION_OF_IKKS_COMPLEX	11	-0.586258	-1.42561	0.0996441	0.196863
REACTOME_HORMONE_SENSITIVE_LIPASE_HSL_MEDIATED_TRIACYLGLYCEROL_HYDROLYSIS	11	-0.581202	-1.42479	0.092081	0.194853
REACTOME_CLASS_B2_SECRETIN_FAMILY_RECEPTORS	61	-0.386277	-1.42435	0.045045	0.192507
REACTOME_OPIOID_SIGNALLING	67	-0.373434	-1.41515	0.0488189	0.200765
REACTOME_ACTIVATED_TLR4_SIGNALLING	14	-0.547041	-1.41041	0.0926573	0.203966
REACTOME_REGULATION_OF_LIPID_METABOLISM_BY_PEROXISOME_PROLIFERATOR_ACTIVATED_RECEPTOR_ALPHA	46	-0.396083	-1.40484	0.063593	0.207565
REACTOME_DOWNSTREAM_SIGNALING_OF_ACTIVATED_FGFR	36	-0.415605	-1.38024	0.0874233	0.237153
REACTOME_REGULATION_OF_INSULIN_SECRETION_BY_ACETYLCHOLINE	18	-0.489269	-1.37626	0.110924	0.239317
REACTOME_THE_ROLE_OF_NEF_IN_HIV1_REPLICATION_AND_DISEASE_PATHOGENESIS	21	-0.474008	-1.36761	0.108108	0.248007
REACTOME_CELL_CELL_ADHESION_SYSTEMS	41	-0.400073	-1.34552	0.096563	0.277444
REACTOME_CTLA4_INHIBITORY_SIGNALING	19	-0.467026	-1.34248	0.119171	0.278595
REACTOME_G_PROTEIN_BETA_GAMMA_SIGNALLING	23	-0.444138	-1.34214	0.112605	0.275603
REACTOME_TOLL_RECEPTOR_CASCADES	70	-0.351278	-1.3312	0.0810811	0.289009
REACTOME_OTHER_SEMAPHORIN_INTERACTIONS	14	-0.5001	-1.32768	0.145581	0.290913
REACTOME_CRMPS_IN_SEMA3A_SIGNALING	15	-0.498248	-1.32336	0.133791	0.293959
REACTOME_AMINE_LIGAND_BINDING_RECEPTORS	20	-0.47267	-1.31967	0.137124	0.295999
REACTOME_GLUCAGON_TYPE_LIGAND_RECEPTORS	23	-0.43171	-1.31239	0.143089	0.304101
REACTOME_GAP_JUNCTION_TRAFFICKING	18	-0.461821	-1.28701	0.162069	0.342334
REACTOME_THROMBOXANE_SIGNALLING_THROUGH_TP_RECEPTOR	19	-0.462036	-1.28316	0.163478	0.344927
REACTOME_G_BETA_GAMMA_SIGNALLING_THROUGH_PI3KGAMMA	20	-0.446539	-1.26843	0.196864	0.367478
REACTOME_DEATH_RECEPTOR_SIGNALLING	13	-0.487001	-1.26732	0.193825	0.36503
REACTOME_GLYCOLYSIS	18	-0.453893	-1.25717	0.189744	0.379381
REACTOME_NEF_MEDIATES_DOWN_MODULATION_OF_CELL_SURFACE_RECEPTORS_BY_RECRUITING_THEM_TO_CLATHRIN_ADAPTERS	15	-0.463344	-1.25564	0.194107	0.377844
REACTOME_BIOLOGICAL_OXIDATIONS	73	-0.334772	-1.2527	0.134529	0.378714
REACTOME_CD28_CO_STIMULATION	22	-0.426209	-1.24588	0.189935	0.387009
REACTOME_DOWN_STREAM_SIGNAL_TRANSDUCTION	32	-0.380972	-1.24139	0.169903	0.391547
REACTOME_PLC_BETA_MEDIATED_EVENTS	33	-0.38041	-1.23253	0.176277	0.403796
REACTOME_IRS_RELATED_EVENTS	61	-0.332113	-1.21458	0.172414	0.434809
REACTOME_GS_ALPHA_MEDIATED_EVENTS_IN_GLUCAGON_SIGNALLING	23	-0.405182	-1.20536	0.216638	0.448553
REACTOME_CYTOCHROME_P450_ARRANGED_BY_SUBSTRATE_TYPE	31	-0.372011	-1.19119	0.228856	0.473048
REACTOME_EARLY_PHASE_OF_HIV_LIFE_CYCLE	13	-0.454554	-1.18365	0.25394	0.484956
REACTOME_G_ALPHA_S_SIGNALLING_EVENTS	70	-0.309705	-1.18101	0.199695	0.485582
REACTOME_TOLL_LIKE_RECEPTOR_9_CASCADE	14	-0.449905	-1.1768	0.247834	0.489577
REACTOME_G_BETA_GAMMA_SIGNALLING_THROUGH_PLC_BETA	17	-0.426888	-1.1512	0.297697	0.541433
REACTOME_ADP_SIGNALLING_THROUGH_P2Y_PURINOCEPTOR_1	20	-0.406136	-1.14392	0.289689	0.552756
REACTOME_NUCLEOTIDE_LIKE_PURINERGIC_RECEPTORS	10	-0.449723	-1.10789	0.324742	0.632694
REACTOME_TRAF6_MEDIATED_INDUCTION_OF_THE_ANTIVIRAL_CYTOKINE_IFN_ALPHA_BETA_CASCADE	47	-0.311699	-1.09558	0.338188	0.657283
REACTOME_AKT_PHOSPHORYLATES_TARGETS_IN_THE_CYTOSOL	14	-0.405568	-1.09047	0.351064	0.663722
REACTOME_REGULATION_OF_BETA_CELL_DEVELOPMENT	89	-0.277137	-1.09043	0.309144	0.657358
REACTOME_ENDOGENOUS_STEROLS	11	-0.445331	-1.08679	0.372174	0.66013
REACTOME_ABORTIVE_ELONGATION_OF_HIV1_TRANSCRIPT_IN_THE_ABSENCE_OF_TAT	23	-0.365084	-1.08445	0.364379	0.659742
REACTOME_PI3K_AKT_SIGNALLING	28	-0.34049	-1.07872	0.340678	0.667788
REACTOME_LYSOSOME_VESICLE_BIOGENESIS	20	-0.372515	-1.0771	0.362126	0.665573
REACTOME_DOPAMINE_NEUROTRANSMITTER_RELEASE_CYCLE	11	-0.437861	-1.06435	0.389587	0.691215
REACTOME_TIGHT_JUNCTION_INTERACTIONS	23	-0.35091	-1.05788	0.390785	0.701091
REACTOME_SEMA3A_PAK_DEPENDENT_AXON_REPULSION	11	-0.42052	-1.05397	0.408929	0.70471
REACTOME_TOLL_LIKE_RECEPTOR_3_CASCADE	53	-0.296286	-1.04863	0.374608	0.711806
REACTOME_ACTIVATION_OF_KAINATE_RECEPTORS_UPON_GLUTAMATE_BINDING	25	-0.339914	-1.04779	0.415435	0.707261
REACTOME_TRANSFORMATION_OF_LANOSTEROL_TO_CHOLESTEROL	10	-0.42939	-1.03774	0.432526	0.726513
REACTOME_PROTEOLYTIC_CLEAVAGE_OF_SNARE_COMPLEX_PROTEINS	11	-0.418563	-1.03625	0.449324	0.724016
REACTOME_GAP_JUNCTION_DEGRADATION	10	-0.431523	-1.03373	0.451499	0.723555
REACTOME_TAT_MEDIATED_HIV1_ELONGATION_ARREST_AND_RECOVERY	30	-0.324801	-1.0291	0.426598	0.728187
REACTOME_RNA_POLYMERASE_III_TRANSCRIPTION_TERMINATION	15	-0.383755	-1.02602	0.431065	0.729851
REACTOME_TRIACYLGLYCERIDE_BIOSYNTHESIS	13	-0.396778	-1.02563	0.441026	0.724673
REACTOME_SIGNAL_AMPLIFICATION	26	-0.340607	-1.017	0.430486	0.739788
REACTOME_REGULATION_OF_GENE_EXPRESSION_IN_BETA_CELLS	81	-0.260213	-1.01518	0.431487	0.738011
REACTOME_METABOLISM_OF_LIPIDS_AND_LIPOPROTEINS	169	-0.231038	-1.00371	0.4487	0.760596
REACTOME_TRANSMISSION_ACROSS_CHEMICAL_SYNAPSES	95	-0.250919	-0.995498	0.456086	0.77488
REACTOME_ADP_SIGNALLING_THROUGH_P2Y_PURINOCEPTOR_12	18	-0.353694	-0.990525	0.455185	0.780957
REACTOME_SEROTONIN_NEUROTRANSMITTER_RELEASE_CYCLE	10	-0.418097	-0.989681	0.471631	0.776606
REACTOME_MAP_KINASES_ACTIVATION_IN_TLR_CASCADE	39	-0.290519	-0.985598	0.470405	0.780619
REACTOME_SEMA3A_PLEXIN_REPULSION_SIGNALING_BY_INHIBITING_INTEGRIN_ADHESION	13	-0.376976	-0.97807	0.48135	0.792867
REACTOME_NEURORANSMITTER_RECEPTOR_BINDING_AND_DOWNSTREAM_TRANSMISSION_IN_THE_POSTSYNAPTIC_CELL	60	-0.264406	-0.975761	0.496025	0.792376
REACTOME_GLUCAGON_SIGNALING_IN_METABOLIC_REGULATION	30	-0.303592	-0.963856	0.526496	0.815153
REACTOME_METABOLISM_OF_NITRIC_OXIDE	11	-0.387217	-0.96288	0.528369	0.811286
REACTOME_FORMATION_OF_FIBRIN_CLOT_CLOTTING_CASCADE	21	-0.330828	-0.949952	0.552189	0.836911
REACTOME_APOPTOSIS	111	-0.233789	-0.948553	0.553957	0.83411
REACTOME_TIE2_SIGNALING	15	-0.350718	-0.945682	0.529825	0.834583
REACTOME_NUCLEAR_RECEPTOR_TRANSCRIPTION_PATHWAY	34	-0.288463	-0.941813	0.5347	0.837327
REACTOME_G_PROTEIN_ACTIVATION	20	-0.326709	-0.939875	0.515651	0.836038
REACTOME_PLC_GAMMA1_SIGNALLING	30	-0.295276	-0.939814	0.538961	0.830051
REACTOME_SIGNALING_BY_TGF_BETA	14	-0.35716	-0.920939	0.589255	0.86891
REACTOME_ACTIVATED_TAK1_MEDIATES_P38_MAPK_ACTIVATION	10	-0.390217	-0.918776	0.546448	0.867952
REACTOME_PYRIMIDINE_METABOLISM	18	-0.326254	-0.917745	0.561939	0.864086
REACTOME_SIGNALING_BY_EGFR	41	-0.265513	-0.90981	0.609177	0.876773
REACTOME_RAS_ACTIVATION_UOPN_CA2_INFUX_THROUGH_NMDA_RECEPTOR	13	-0.351045	-0.907252	0.571429	0.876663
REACTOME_TRKA_SIGNALLING_FROM_THE_PLASMA_MEMBRANE	86	-0.234447	-0.904637	0.644874	0.876565
REACTOME_EFFECTS_OF_PIP2_HYDROLYSIS	10	-0.384058	-0.903814	0.59246	0.872279
REACTOME_PEPTIDE_CHAIN_ELONGATION	74	-0.238087	-0.903722	0.622951	0.866375
REACTOME_SCF_SKP2_MEDIATED_DEGRADATION_OF_P27_P21	50	-0.251307	-0.899019	0.599374	0.870846
REACTOME_BOTULINUM_NEUROTOXICITY	13	-0.348668	-0.897947	0.60274	0.867421
REACTOME_RETROGRADE_NEUROTROPHIN_SIGNALLING	10	-0.368062	-0.893886	0.607985	0.870796
REACTOME_ACTIVATION_OF_NMDA_RECEPTOR_UPON_GLUTAMATE_BINDING_AND_POSTSYNAPTIC_EVENTS	27	-0.284474	-0.883684	0.642857	0.887454
REACTOME_GLYCOGEN_BREAKDOWN_GLYCOGENOLYSIS	11	-0.352344	-0.880249	0.591525	0.888896
REACTOME_POST_NMDA_RECEPTOR_ACTIVATION_EVENTS	27	-0.284474	-0.879767	0.623779	0.883938
REACTOME_SIGNALLING_BY_NGF	183	-0.198872	-0.868856	0.766043	0.902083
REACTOME_GLUCOSE_METABOLISM	43	-0.247358	-0.853131	0.701923	0.930502
REACTOME_SOS_MEDIATED_SIGNALLING	11	-0.34659	-0.852488	0.673077	0.925684
REACTOME_SPHINGOLIPID_METABOLISM	23	-0.284221	-0.848027	0.663176	0.928727
REACTOME_CAM_PATHWAY	23	-0.276968	-0.825476	0.723842	0.969594
REACTOME_SIGNALING_BY_BMP	18	-0.297141	-0.819867	0.704974	0.974752
REACTOME_SIGNALLING_TO_P38_VIA_RIT_AND_RIN	10	-0.338214	-0.811554	0.698944	0.984721
REACTOME_FACILITATIVE_NA_INDEPENDENT_GLUCOSE_TRANSPORTERS	10	-0.33593	-0.807369	0.705782	0.986494
REACTOME_CASPASE_MEDIATED_CLEAVAGE_OF_CYTOSKELETAL_PROTEINS	10	-0.339164	-0.805324	0.717687	0.983964
REACTOME_REGULATION_OF_INSULIN_SECRETION_BY_GLUCAGON_LIKE_PEPTIDE_1	51	-0.227898	-0.803971	0.771285	0.980507
REACTOME_TRANSLATION	96	-0.198286	-0.797342	0.867143	0.986909
REACTOME_SYNTHESIS_AND_INTERCONVERSION_OF_NUCLEOTIDE_DI_AND_TRIPHOSPHATES	16	-0.293162	-0.793958	0.726316	0.986466
REACTOME_METABOLISM_OF_VITAMINS_AND_COFACTORS	34	-0.237264	-0.791011	0.786325	0.985749
REACTOME_PURINE_SALVAGE_REACTIONS	10	-0.331171	-0.790305	0.727592	0.980957
REACTOME_GTP_HYDROLYSIS_AND_JOINING_OF_THE_60S_RIBOSOMAL_SUBUNIT	83	-0.198085	-0.776778	0.865151	0.998429
REACTOME_RHO_GTPASE_CYCLE	90	-0.196812	-0.77458	0.868343	0.99618
REACTOME_DARPP32_EVENTS	23	-0.256509	-0.772989	0.80829	0.992841
REACTOME_GLUTAMATE_NEUROTRANSMITTER_RELEASE_CYCLE	14	-0.28679	-0.768406	0.758437	0.994364
REACTOME_FORMATION_OF_A_POOL_OF_FREE_40S_SUBUNITS	73	-0.20173	-0.764794	0.872372	0.994336
REACTOME_GRB2_EVENTS_IN_EGFR_SIGNALING	10	-0.315449	-0.760419	0.766143	0.995008
REACTOME_AMINO_ACID_SYNTHESIS_AND_INTERCONVERSION	12	-0.291741	-0.753796	0.777193	0.99929
REACTOME_VIRAL_MESSENGER_RNA_SYNTHESIS	14	-0.290692	-0.753305	0.810764	0.994226
REACTOME_GENES_INVOLVED_IN_APOPTOTIC_CLEAVAGE_OF_CELLULAR_PROTEINS	29	-0.233867	-0.742412	0.848485	1
REACTOME_GLUCONEOGENESIS	25	-0.243081	-0.726294	0.836601	1
REACTOME_VIRAL_MRNA_TRANSLATION	74	-0.187618	-0.71364	0.915305	1
REACTOME_CHOLESTEROL_BIOSYNTHESIS	19	-0.248156	-0.706463	0.864198	1
REACTOME_ACTIVATION_OF_BH3_ONLY_PROTEINS	12	-0.278021	-0.705496	0.83452	1
REACTOME_G_ALPHA_12_13_SIGNALLING_EVENTS	44	-0.203162	-0.702873	0.911909	1
REACTOME_GLUCOSE_AND_OTHER_SUGAR_SLC_TRANSPORTERS	55	-0.190841	-0.690028	0.930818	1
REACTOME_INTRINSIC_PATHWAY	13	-0.268602	-0.685893	0.86911	1
REACTOME_FORMATION_OF_THE_EARLY_ELONGATION_COMPLEX	32	-0.211229	-0.682865	0.903427	1
REACTOME_HIV1_TRANSCRIPTION_ELONGATION	41	-0.197328	-0.67679	0.919304	1
REACTOME_TRANSLATION_INITIATION_COMPLEX_FORMATION	39	-0.197409	-0.666135	0.93575	1
REACTOME_NA_CL_DEPENDENT_NEUROTRANSMITTER_TRANSPORTERS	13	-0.259006	-0.658707	0.889693	1
REACTOME_DIABETES_PATHWAYS	310	-0.139528	-0.646676	1	1
REACTOME_INTRINSIC_PATHWAY_FOR_APOPTOSIS	22	-0.221706	-0.641785	0.920775	1
REACTOME_FORMATION_OF_THE_TERNARY_COMPLEX_AND_SUBSEQUENTLY_THE_43S_COMPLEX	33	-0.197317	-0.636073	0.954114	1
REACTOME_SHC_MEDIATED_SIGNALLING	10	-0.265402	-0.630898	0.917667	1
REACTOME_EGFR_DOWNREGULATION	21	-0.217136	-0.621439	0.937931	1
REACTOME_AMINE_COMPOUND_SLC_TRANSPORTERS	15	-0.229327	-0.612877	0.944444	1
REACTOME_MAPK_TARGETS_NUCLEAR_EVENTS_MEDIATED_BY_MAP_KINASES	28	-0.184824	-0.570129	0.970724	1
REACTOME_SHC_RELATED_EVENTS	11	-0.229878	-0.553727	0.944643	1
REACTOME_NEUROTRANSMITTER_RELEASE_CYCLE	21	-0.188595	-0.551717	0.978114	1
REACTOME_NRAGE_SIGNALS_DEATH_THROUGH_JNK	37	-0.166055	-0.551101	0.993174	1
REACTOME_SIGNALLING_TO_RAS	22	-0.182211	-0.533172	0.981419	1
REACTOME_ERK_MAPK_TARGETS	19	-0.181137	-0.510979	0.984536	1
REACTOME_CREB_PHOPHORYLATION_THROUGH_THE_ACTIVATION_OF_RAS	21	-0.174347	-0.502359	0.993344	1
REACTOME_FRS2_MEDIATED_ACTIVATION	13	-0.195298	-0.501869	0.994773	1
REACTOME_ACTIVATION_OF_RAC	12	-0.197	-0.486973	0.984238	1
REACTOME_RNA_POLYMERASE_III_CHAIN_ELONGATION	11	-0.196285	-0.480176	0.990859	1
REACTOME_NUCLEAR_EVENTS_KINASE_AND_TRANSCRIPTION_FACTOR_ACTIVATION	22	-0.156676	-0.462887	0.990066	1
REACTOME_PKA_ACTIVATION	15	-0.164912	-0.452143	0.996534	1
REACTOME_ERKS_ARE_INACTIVATED	11	-0.17918	-0.443807	0.991243	1
REACTOME_INSULIN_SYNTHESIS_AND_SECRETION	111	-0.0981814	-0.403154	1	0.999119

## Sheet: Down in Mets Reactome
Table S4D. Reactome Gene Sets down-regulated in Mets
Gene Set	SIZE	ES	NES	NOM p-val	FDR q-val
REACTOME_MITOTIC_PROMETAPHASE	52	0.627098	2.4254	0	0
REACTOME_G2_M_CHECKPOINTS	38	0.657454	2.39449	0	0
REACTOME_SNRNP_ASSEMBLY	43	0.600973	2.29761	0	0.000376126
REACTOME_NUCLEAR_IMPORT_OF_REV_PROTEIN	28	0.665669	2.27971	0	0.000282095
REACTOME_ACTIVATION_OF_ATR_IN_RESPONSE_TO_REPLICATION_STRESS	33	0.64118	2.27942	0	0.000225676
REACTOME_NEP_NS2_INTERACTS_WITH_THE_CELLULAR_EXPORT_MACHINERY	28	0.666668	2.27155	0	0.000188063
REACTOME_TRANSPORT_OF_RIBONUCLEOPROTEINS_INTO_THE_HOST_NUCLEUS	27	0.66194	2.25564	0	0.000161197
REACTOME_METABOLISM_OF_RNA	83	0.523321	2.25409	0	0.000141047
REACTOME_TRANSPORT_OF_THE_SLBP_INDEPENDENT_MATURE_MRNA	31	0.63574	2.22213	0	0.000255135
REACTOME_REV_MEDIATED_NUCLEAR_EXPORT_OF_HIV1_RNA	30	0.634074	2.21482	0	0.000229621
REACTOME_CELL_CYCLE_MITOTIC	227	0.437189	2.20248	0	0.000208746
REACTOME_VPR_MEDIATED_NUCLEAR_IMPORT_OF_PICS	29	0.62059	2.19147	0	0.000191351
REACTOME_REGULATION_OF_GLUCOKINASE_BY_GLUCOKINASE_REGULATORY_PROTEIN	26	0.658512	2.18102	0	0.00026402
REACTOME_MITOTIC_M_M_G1_PHASES	116	0.473039	2.1428	0	0.000497668
REACTOME_RNA_POLYMERASE_I_PROMOTER_CLEARANCE	63	0.515951	2.12323	0	0.000686108
REACTOME_CELL_CYCLE_CHECKPOINTS	102	0.468423	2.10228	0	0.00099069
REACTOME_TRANSPORT_OF_MATURE_MRNA_DERIVED_FROM_AN_INTRON_CONTAINING_TRANSCRIPT	46	0.548359	2.05548	0	0.00169029
REACTOME_RNA_POLYMERASE_I_PROMOTER_OPENING	42	0.5282	2.04373	0	0.00185348
REACTOME_PROCESSING_OF_CAPPED_INTRON_CONTAINING_PRE_MRNA	107	0.446809	2.00664	0	0.00286887
REACTOME_RNA_POLYMERASE_I_CHAIN_ELONGATION	28	0.561465	1.92831	0.00239808	0.00913614
REACTOME_CENTROSOME_MATURATION	48	0.491826	1.92174	0	0.00902298
REACTOME_ACTIVATION_OF_THE_PRE_REPLICATIVE_COMPLEX	26	0.570506	1.89055	0	0.0120588
REACTOME_GLUCOSE_TRANSPORT	32	0.533778	1.88739	0	0.0119597
REACTOME_CDC6_ASSOCIATION_WITH_THE_ORC:ORIGIN_COMPLEX	11	0.718402	1.88247	0.0114943	0.0121419
REACTOME_RNA_POLYMERASE_I_PROMOTER_ESCAPE	19	0.615844	1.88036	0	0.0119445
REACTOME_TELOMERE_MAINTENANCE	58	0.478375	1.86827	0.002849	0.012971
REACTOME_PACKAGING_OF_TELOMERE_ENDS	36	0.518546	1.86198	0	0.0133074
REACTOME_STEROID_HORMONES	14	0.633352	1.7766	0.007109	0.0288082
REACTOME_LATE_PHASE_OF_HIV_LIFE_CYCLE	87	0.406199	1.76674	0	0.0302147
REACTOME_LOSS_OF_NLP_FROM_MITOTIC_CENTROSOMES	41	0.47592	1.76057	0.00540541	0.0306594
REACTOME_G2_M_TRANSITION	60	0.424691	1.72757	0	0.0396353
REACTOME_ASSOCIATION_OF_LICENSING_FACTORS_WITH_THE_PREREPLICATIVE_COMPLEX	12	0.634761	1.71746	0.00959233	0.0426704
REACTOME_E2F_MEDIATED_REGULATION_OF_DNA_REPLICATION	27	0.509312	1.7167	0.0108401	0.0417283
REACTOME_DOUBLE_STRAND_BREAK_REPAIR	19	0.551407	1.71408	0.00492611	0.041487
REACTOME_RNA_POLYMERASE_I_TRANSCRIPTION_INITIATION	22	0.539531	1.71039	0.00246914	0.041794
REACTOME_RNA_POLYMERASE_I_III_AND_MITOCHONDRIAL_TRANSCRIPTION	97	0.382855	1.7053	0	0.042295
REACTOME_METABOLISM_OF_AMINO_ACIDS	136	0.366165	1.70241	0	0.042016
REACTOME_DNA_REPAIR	85	0.387778	1.6927	0	0.04428
REACTOME_TRANSCRIPTION	165	0.354653	1.69052	0	0.0440007
REACTOME_CDT1_ASSOCIATION_WITH_THE_CDC6_ORC_ORIGIN_COMPLEX	51	0.432751	1.6755	0.00557103	0.0483652
REACTOME_PHOSPHORYLATION_OF_THE_APC	14	0.595739	1.67124	0.016092	0.0487258
REACTOME_NRIF_SIGNALS_CELL_DEATH_FROM_THE_NUCLEUS	11	0.638281	1.67083	0.0114155	0.047738
REACTOME_INACTIVATION_OF_APC_VIA_DIRECT_INHIBITION_OF_THE_APCOMPLEX	16	0.567934	1.66116	0.0115473	0.0505601
REACTOME_DNA_REPLICATION_PRE_INITIATION	71	0.399559	1.64294	0.00895522	0.0572952
REACTOME_METABOLISM_OF_MRNA	40	0.441256	1.6285	0.0134771	0.0615884
REACTOME_GLUTATHIONE_CONJUGATION	13	0.579032	1.61928	0.0223714	0.064626
REACTOME_G1_S_TRANSITION	93	0.369097	1.61254	0.00591716	0.0662967
REACTOME_TRANSMEMBRANE_TRANSPORT_OF_SMALL_MOLECULES	159	0.335277	1.60991	0	0.0662792
REACTOME_FORMATION_AND_MATURATION_OF_MRNA_TRANSCRIPT	120	0.35067	1.60908	0	0.0655125
REACTOME_SYNTHESIS_OF_GLYCOSYLPHOSPHATIDYLINOSITOL	15	0.572313	1.59417	0.0272727	0.0716417
REACTOME_S_PHASE	92	0.356763	1.58172	0.00625	0.0775362
REACTOME_MRNA_3_END_PROCESSING	27	0.472105	1.571	0.0214477	0.0814246
REACTOME_APCDC20_MEDIATED_DEGRADATION_OF_CYCLIN_B	15	0.536232	1.56745	0.0357143	0.0815788
REACTOME_BRANCHED_CHAIN_AMINO_ACID_CATABOLISM	16	0.531755	1.55198	0.0379747	0.0894191
REACTOME_GLOBAL_GENOMIC_NER	30	0.452086	1.54872	0.0287958	0.0897123
REACTOME_PHASE_II_CONJUGATION	31	0.444819	1.54062	0.0172414	0.0930616
REACTOME_SYNTHESIS_OF_DNA	79	0.356216	1.53902	0.0058997	0.0922474
REACTOME_MRNA_DECAY_BY_5_TO_3_EXORIBONUCLEASE	10	0.614039	1.53885	0.0381166	0.090676
REACTOME_MRNA_SPLICING	77	0.360686	1.53066	0.00877193	0.0940115
REACTOME_HIV_LIFE_CYCLE	100	0.349516	1.52147	0.0123077	0.0980719
REACTOME_REPAIR_SYNTHESIS_OF_PATCH_27_30_BASES_LONG_BY_DNA_POLYMERASE	14	0.528099	1.51021	0.0440529	0.103624
REACTOME_AMINO_ACID_TRANSPORT_ACROSS_THE_PLASMA_MEMBRANE	27	0.447615	1.50687	0.0567901	0.10399
REACTOME_HOMOLOGOUS_RECOMBINATION_REPAIR	13	0.54034	1.4983	0.0552764	0.10751
REACTOME_M_G1_TRANSITION	60	0.365958	1.48555	0.0132275	0.11437
REACTOME_EXTENSION_OF_TELOMERES	22	0.460181	1.4671	0.0510204	0.126338
REACTOME_AMINO_ACID_AND_OLIGOPEPTIDE_SLC_TRANSPORTERS	38	0.399259	1.46094	0.0353261	0.128819
REACTOME_SYNTHESIS_OF_GPI_ANCHORED_PROTEINS	23	0.447435	1.46024	0.0503979	0.127425
REACTOME_ELONGATION_AND_PROCESSING_OF_CAPPED_TRANSCRIPTS	104	0.32366	1.44992	0.0157233	0.133951
REACTOME_PYRUVATE_METABOLISM_AND_TCA_CYCLE	34	0.399739	1.43188	0.0505319	0.146197
REACTOME_INORGANIC_CATION_ANION_SLC_TRANSPORTERS	71	0.344778	1.42588	0.0293255	0.149388
REACTOME_CONVERSION_FROM_APC_CDC20_TO_APC_CDH1_IN_LATE_ANAPHASE	14	0.50722	1.41252	0.101896	0.159428
REACTOME_NUCLEOTIDE_EXCISION_REPAIR	46	0.363128	1.36646	0.0796703	0.202937
REACTOME_RNA_POLYMERASE_II_TRANSCRIPTION	83	0.320994	1.35922	0.0528053	0.208095
REACTOME_TRANSCRIPTION_COUPLED_NER	43	0.360165	1.35392	0.0671642	0.211317
REACTOME_STEROID_METABOLISM	43	0.353303	1.34525	0.0814607	0.218184
REACTOME_REGULATED_PROTEOLYSIS_OF_P75NTR	10	0.527851	1.34464	0.142191	0.215772
REACTOME_CITRIC_ACID_CYCLE	19	0.441619	1.33424	0.120567	0.224823
REACTOME_REGULATION_OF_APC_ACTIVATORS_BETWEEN_G1_S_AND_EARLY_ANAPHASE	65	0.325495	1.32869	0.0630373	0.228476
REACTOME_PEROXISOMAL_LIPID_METABOLISM	14	0.465091	1.32047	0.13986	0.23523
REACTOME_MYOGENESSIS	21	0.417142	1.31654	0.116592	0.236589
REACTOME_LAGGING_STRAND_SYNTHESIS	16	0.449168	1.30706	0.160271	0.24552
REACTOME_ORC1_REMOVAL_FROM_CHROMATIN	61	0.319039	1.29093	0.0997151	0.263488
REACTOME_CYCLIN_A1_ASSOCIATED_EVENTS_DURING_G2_M_TRANSITION	14	0.452393	1.2879	0.17561	0.264289
REACTOME_AUTODEGRADATION_OF_CDH1_BY_CDH1_APC	53	0.324274	1.28399	0.127841	0.266239
REACTOME_OLFACTORY_SIGNALING_PATHWAY	80	0.302979	1.28268	0.0684524	0.26473
REACTOME_GENE_EXPRESSION	319	0.24441	1.28094	0.0149254	0.263857
REACTOME_RNA_POLYMERASE_I_TRANSCRIPTION_TERMINATION	20	0.407204	1.26631	0.16055	0.279604
REACTOME_HOST_INTERACTIONS_OF_HIV_FACTORS	108	0.281776	1.25991	0.0604027	0.285033
REACTOME_REGULATION_OF_PYRUVATE_DEHYDROGENASE_COMPLEX	11	0.488166	1.25869	0.192308	0.28357
REACTOME_DEADENYLATION_OF_MRNA	21	0.402684	1.25769	0.189815	0.281897
REACTOME_POLYMERASE_SWITCHING	11	0.472759	1.24802	0.211712	0.291491
REACTOME_HORMONE_BIOSYNTHESIS	30	0.355361	1.2465	0.15601	0.290451
REACTOME_CDC20_PHOSPHO_APC_MEDIATED_DEGRADATION_OF_CYCLIN_A	59	0.303343	1.21396	0.131805	0.335175
REACTOME_VITAMIN_B5_(PANTOTHENATE)_METABOLISM	11	0.447134	1.21217	0.21267	0.334427
REACTOME_ELECTRON_TRANSPORT_CHAIN	60	0.292095	1.19953	0.169054	0.351394
REACTOME_DUAL_INCISION_REACTION_IN_GG_NER	18	0.388524	1.18747	0.234867	0.367463
REACTOME_SLC_MEDIATED_TRANSMEMBRANE_TRANSPORT	120	0.254478	1.18425	0.132258	0.36882
REACTOME_INFLUENZA_LIFE_CYCLE	123	0.258865	1.18273	0.127208	0.367474
REACTOME_GENERIC_TRANSCRIPTION_PATHWAY	16	0.407081	1.17408	0.24424	0.377986
REACTOME_ZINC_TRANSPORTATION	13	0.422746	1.16972	0.284689	0.381426
REACTOME_ENERGY_DEPENDENT_REGULATION_OF_MTOR_BY_LKB1_AMPK	12	0.434973	1.1668	0.284483	0.383058
REACTOME_HIV_INFECTION	169	0.24201	1.15131	0.11828	0.405832
REACTOME_DNA_STRAND_ELONGATION	23	0.358186	1.14578	0.275058	0.411671
REACTOME_BETACATENIN_PHOSPHORYLATION_CASCADE	11	0.43184	1.14411	0.309013	0.41064
REACTOME_SYNTHESIS_OF_BILE_ACIDS_AND_BILE_SALTS	12	0.423852	1.13014	0.306024	0.431561
REACTOME_REGULATION_OF_ORNITHINE_DECARBOXYLASE	46	0.294972	1.12686	0.252174	0.433498
REACTOME_HIV1_TRANSCRIPTION_INITIATION	37	0.313571	1.12587	0.2875	0.431156
REACTOME_PYRUVATE_METABOLISM	16	0.383866	1.12205	0.294664	0.433498
REACTOME_METABOLISM_OF_BILE_ACIDS_AND_BILE_SALTS	15	0.393125	1.12079	0.301435	0.431927
REACTOME_FORMATION_OF_TUBULIN_FOLDING_INTERMEDIATES_BY_CCT_TRIC	12	0.412171	1.11195	0.304054	0.444131
REACTOME_POST_TRANSLATIONAL_PROTEIN_MODIFICATION	32	0.313625	1.08808	0.313131	0.485294
REACTOME_PURINE_RIBONUCLEOSIDE_MONOPHOSPHATE_BIOSYNTHESIS	10	0.408028	1.05747	0.38512	0.543347
REACTOME_UNFOLDED_PROTEIN_RESPONSE	18	0.348859	1.05418	0.360092	0.545433
REACTOME_MTOR_SIGNALLING	20	0.33956	1.04931	0.410959	0.551341
REACTOME_ACTIVATED_AMPK_STIMULATES_FATTY_ACID_OXIDATION_IN_MUSCLE	12	0.388564	1.04838	0.39905	0.548503
REACTOME_ACTIVATION_OF_CHAPERONES_BY_IRE1_ALPHA	10	0.407028	1.04368	0.414414	0.55373
REACTOME_METABLISM_OF_NUCLEOTIDES	59	0.257211	1.02817	0.402857	0.582038
REACTOME_SIGNALING_BY_WNT	54	0.257834	1.02489	0.397183	0.584524
REACTOME_RNA_POL_II_CTD_PHOSPHORYLATION_AND_INTERACTION_WITH_CE	26	0.309481	1.02256	0.398515	0.584622
REACTOME_P53_INDEPENDENT_DNA_DAMAGE_RESPONSE	42	0.272026	1.02167	0.434316	0.58186
REACTOME_STABILIZATION_OF_P53	45	0.266482	1.01342	0.408163	0.594196
REACTOME_MRNA_SPLICING_MINOR_PATHWAY	36	0.285123	1.01333	0.43617	0.589536
REACTOME_SIGNALING_BY_NOTCH	14	0.354344	0.995803	0.457547	0.622904
REACTOME_RNA_POLYMERASE_III_TRANSCRIPTION_INITIATION_FROM_TYPE_2_PROMOTER	18	0.327499	0.994795	0.44898	0.619906
REACTOME_RNA_POLYMERASE_III_TRANSCRIPTION_INITIATION	26	0.295318	0.989208	0.472813	0.626563
REACTOME_SCF_BETA_TRCP_MEDIATED_DEGRADATION_OF_EMI1	45	0.255298	0.985702	0.490617	0.629216
REACTOME_RNA_POLYMERASE_III_TRANSCRIPTION_INITIATION_FROM_TYPE_3_PROMOTER	20	0.31446	0.984759	0.489848	0.626208
REACTOME_REMOVAL_OF_THE_FLAP_INTERMEDIATE	10	0.373793	0.98123	0.46789	0.628894
REACTOME_TRANSCRIPTION_OF_THE_HIV_GENOME	57	0.24247	0.979209	0.471429	0.628537
REACTOME_CYCLIN_E_ASSOCIATED_EVENTS_DURING_G1_S_TRANSITION_	56	0.243371	0.978619	0.5	0.625093
REACTOME_MRNA_PROCESSING	29	0.285731	0.975125	0.511905	0.627988
REACTOME_VIF_MEDIATED_DEGRADATION_OF_APOBEC3G	46	0.253192	0.969812	0.461538	0.634396
REACTOME_METABOLISM_OF_CARBOHYDRATES	90	0.220482	0.96598	0.514286	0.638213
REACTOME_GOLGI_ASSOCIATED_VESICLE_BIOGENESIS	44	0.249037	0.939209	0.571059	0.690822
REACTOME_METAL_ION_SLC_TRANSPORTERS	19	0.306189	0.936714	0.549261	0.691561
REACTOME_GLUCOSE_REGULATION_OF_INSULIN_SECRETION	133	0.198107	0.92057	0.649832	0.721034
REACTOME_G1_PHASE	15	0.326465	0.914564	0.575342	0.728795
REACTOME_INHIBITION_OF_INSULIN_SECRETION_BY_ADRENALINE_NORADRENALINE	25	0.27572	0.912626	0.595477	0.727697
REACTOME_DUAL_INCISION_REACTION_IN_TC_NER	28	0.268195	0.897379	0.605195	0.754112
REACTOME_TRNA_AMINOACYLATION	25	0.26567	0.890826	0.645783	0.762823
REACTOME_E2F_TRANSCRIPTIONAL_TARGETS_AT_G1_S	17	0.284026	0.841394	0.681716	0.854407
REACTOME_PREFOLDIN_MEDIATED_TRANSFER_OF_SUBSTRATE_TO_CCT_TRIC	18	0.272798	0.83332	0.7	0.863583
REACTOME_INTEGRATION_OF_ENERGY_METABOLISM	188	0.169733	0.8284	0.890566	0.866912
REACTOME_MICRORNA_BIOGENESIS	18	0.275035	0.819151	0.740385	0.877651
REACTOME_FORMATION_OF_ATP_BY_CHEMIOSMOTIC_COUPLING	13	0.294345	0.804497	0.695035	0.896729
REACTOME_CELL_DEATH_SIGNALLING_VIA_NRAGE_NRIF_AND_NADE	49	0.203222	0.797903	0.851852	0.901912
REACTOME_REMOVAL_OF_DNA_PATCH_CONTAINING_ABASIC_RESIDUE	13	0.270874	0.771656	0.76815	0.936322
REACTOME_CLATHRIN_DERIVED_VESICLE_BUDDING	50	0.196719	0.757509	0.877922	0.949612
REACTOME_APOPTOTIC_EXECUTION_PHASE	38	0.200957	0.746442	0.891821	0.957736
REACTOME_CREB_PHOSPHORYLATION_THROUGH_THE_ACTIVATION_OF_CAMKII	11	0.290712	0.742735	0.817778	0.955841
REACTOME_MEMBRANE_TRAFFICKING	60	0.178823	0.73337	0.923729	0.961351
REACTOME_PURINE_METABOLISM	26	0.217081	0.721174	0.880319	0.968877
REACTOME_BASE_EXCISION_REPAIR	16	0.242846	0.715697	0.846715	0.968221
REACTOME_SIGNALING_BY_ROBO_RECEPTOR	29	0.207268	0.70641	0.884058	0.971759
REACTOME_REGULATION_OF_INSULIN_SECRETION	175	0.142307	0.688912	1	0.981742
REACTOME_RNA_POLYMERASE_III_TRANSCRIPTION	30	0.197942	0.687467	0.916667	0.976789
REACTOME_RESOLUTION_OF_AP_SITES_VIA_THE_SINGLE_NUCLEOTIDE_REPLACEMENT_PATHWAY	11	0.256601	0.668073	0.880282	0.986493
REACTOME_CHAPERONIN_MEDIATED_PROTEIN_FOLDING	35	0.178902	0.64301	0.956757	0.997414
REACTOME_P75_NTR_RECEPTOR_MEDIATED_SIGNALLING	70	0.152717	0.639215	0.993994	0.993704
REACTOME_G_ALPHA_Z_SIGNALLING_EVENTS	12	0.23408	0.620128	0.918224	0.998764
REACTOME_ASSOCIATION_OF_TRIC_CCT_WITH_TARGET_PROTEINS_DURING_BIOSYNTHESIS	25	0.190978	0.619891	0.977612	0.992626
REACTOME_P38MAPK_EVENTS	12	0.211567	0.571592	0.962617	1
REACTOME_INFLUENZA_VIRAL_RNA_TRANSCRIPTION_AND_REPLICATION	88	0.123647	0.540513	1	1
REACTOME_TRAFFICKING_OF_AMPA_RECEPTORS	16	0.183703	0.535914	0.983721	1
REACTOME_CYTOSOLIC_TRNA_AMINOACYLATION	18	0.172384	0.52005	0.979021	1
REACTOME_METABOLISM_OF_PROTEINS	166	0.107744	0.513462	1	0.996806
REACTOME_SIGNALLING_TO_ERKS	29	0.146597	0.500198	0.997409	0.993074

## Sheet: Up in MetsTranscription Factors
Table S4E. Transcription factor target gene sets up-regulated in Mets
Gene Set	SIZE	ES	NES	NOM p-val	FDR q-val
GGGNNTTTCC_V$NFKB_Q6_01	95	-0.534433	-2.14073	0	0
V$IRF1_01	153	-0.497615	-2.12163	0	0
V$SRF_01	41	-0.613604	-2.11537	0	0
STTTCRNTTT_V$IRF_Q6	133	-0.482903	-2.0078	0	0.00321691
V$STAT5B_01	159	-0.459495	-1.97665	0	0.00615411
V$BACH2_01	179	-0.447921	-1.94766	0	0.00711086
V$IRF_Q6	150	-0.455994	-1.94318	0	0.0064285
V$CREL_01	176	-0.443988	-1.93608	0	0.00577383
V$AP1_01	168	-0.44264	-1.9099	0	0.00617347
V$SRF_C	154	-0.450944	-1.90902	0	0.00567552
V$SRF_Q6	185	-0.435698	-1.90759	0	0.00515956
V$NFKAPPAB_01	160	-0.43635	-1.88735	0	0.00610511
V$BACH1_01	170	-0.431084	-1.878	0	0.00608969
V$TATA_C	183	-0.426533	-1.87664	0	0.00565472
TGANTCA_V$AP1_C	701	-0.38437	-1.87634	0	0.00527773
V$AP1_Q4_01	177	-0.428122	-1.84416	0	0.00735866
V$SRF_Q5_01	163	-0.423349	-1.83379	0	0.00748046
V$SRF_Q4	165	-0.421628	-1.82596	0	0.00778941
V$STAT5A_01	163	-0.427366	-1.81976	0	0.00793328
V$ELF1_Q6	157	-0.422461	-1.81519	0	0.00777436
V$ISRE_01	143	-0.431058	-1.81492	0	0.00740415
V$PAX_Q6	167	-0.418952	-1.81391	0	0.00722674
WGGAATGY_V$TEF1_Q6	233	-0.4002	-1.80451	0	0.00752282
V$PEA3_Q6	157	-0.413836	-1.79826	0.00137363	0.00794021
V$AP1_Q4	183	-0.410067	-1.79025	0	0.00832279
V$ICSBP_Q6	157	-0.418552	-1.78309	0	0.0087697
V$AP2ALPHA_01	157	-0.410841	-1.7787	0	0.0089695
V$AREB6_04	157	-0.412931	-1.77242	0	0.00932395
V$AP2REP_01	104	-0.433314	-1.76733	0	0.009444
V$NFKAPPAB65_01	163	-0.412241	-1.75582	0	0.0107362
V$NFKB_Q6	171	-0.402724	-1.75213	0	0.0107714
V$RREB1_01	140	-0.411074	-1.73233	0	0.0140071
V$NFKB_Q6_01	147	-0.40663	-1.72583	0.0013947	0.0142599
CCAWWNAAGG_V$SRF_Q4	64	-0.463465	-1.71975	0.00465839	0.0148505
V$AFP1_Q6	154	-0.402863	-1.71857	0.00141044	0.0146888
V$AP1_Q6	173	-0.399742	-1.71733	0	0.0143457
RYCACNNRNNRNCAG_UNKNOWN	47	-0.494186	-1.71654	0.00480769	0.013989
AAANWWTGC_UNKNOWN	135	-0.413632	-1.71573	0.00138889	0.0138097
TGGAAA_V$NFAT_Q4_01	1143	-0.338563	-1.71143	0	0.0143065
V$AP4_Q6	149	-0.398045	-1.70204	0	0.0153329
CCCNNGGGAR_V$OLF1_01	206	-0.3839	-1.6927	0	0.016595
TGGNNNNNNKCCAR_UNKNOWN	273	-0.371849	-1.69054	0	0.0163698
V$FREAC4_01	89	-0.429903	-1.6895	0	0.0162884
V$AP1_Q6_01	167	-0.388189	-1.67999	0	0.0175505
V$HEB_Q6	169	-0.383114	-1.67427	0	0.018019
CTTTAAR_UNKNOWN	589	-0.345602	-1.6697	0	0.018775
GCCNNNWTAAR_UNKNOWN	92	-0.415253	-1.66796	0.00435414	0.0186514
V$NRSF_01	55	-0.456694	-1.66732	0.00597907	0.0184825
V$CHOP_01	141	-0.389413	-1.65122	0.0027972	0.0219435
V$NFKB_C	172	-0.374745	-1.64869	0	0.0221428
V$AP1_Q2	184	-0.38002	-1.64253	0	0.0230989
V$AP1_Q2_01	184	-0.366731	-1.63309	0.00136612	0.025038
GCANCTGNY_V$MYOD_Q6	557	-0.336218	-1.631	0	0.0251458
CAGGTG_V$E12_Q6	1528	-0.319767	-1.62997	0	0.0251376
V$AP1FJ_Q2	190	-0.371635	-1.6262	0	0.025737
V$IRF7_01	170	-0.375049	-1.62372	0.00145138	0.0261189
RYTTCCTG_V$ETS2_B	669	-0.32773	-1.61741	0	0.0275425
V$HEN1_02	122	-0.391005	-1.6169	0.00144092	0.0272304
V$CACCCBINDINGFACTOR_Q6	169	-0.374112	-1.61363	0.00270636	0.0276257
V$ATF1_Q6	156	-0.3748	-1.61314	0.00277393	0.027342
YTATTTTNR_V$MEF2_02	403	-0.339199	-1.61062	0	0.0276876
V$IRF2_01	80	-0.417288	-1.6104	0.00289436	0.0272805
GGGAGGRR_V$MAZ_Q6	1473	-0.316215	-1.6103	0	0.0268666
CTGRYYYNATT_UNKNOWN	36	-0.480348	-1.60977	0.00505051	0.0265903
YTAAYNGCT_UNKNOWN	90	-0.408513	-1.60631	0.00150602	0.0273975
V$FREAC3_01	150	-0.375845	-1.60346	0	0.027814
V$GATA3_01	145	-0.377249	-1.60239	0.0013986	0.027837
V$PIT1_Q6	136	-0.381748	-1.59726	0	0.0291935
V$RP58_01	136	-0.379697	-1.59608	0	0.0292009
V$E2A_Q2	149	-0.375685	-1.59547	0.00140252	0.0289342
V$TATA_01	166	-0.36679	-1.5887	0	0.0307111
GGGTGGRR_V$PAX4_03	847	-0.320287	-1.58734	0	0.0308418
RTAAACA_V$FREAC2_01	573	-0.326447	-1.58308	0	0.0317905
V$MEF2_03	148	-0.374817	-1.58278	0	0.0315046
V$NFAT_Q6	142	-0.369249	-1.58197	0	0.0314288
ARGGGTTAA_UNKNOWN	80	-0.406514	-1.57708	0.00306279	0.0327114
TGCTGAY_UNKNOWN	327	-0.336073	-1.56596	0	0.0364063
V$AMEF2_Q6	148	-0.369878	-1.56289	0.00142248	0.0371501
V$HNF4_Q6	157	-0.36537	-1.56109	0	0.0373232
V$SMAD4_Q6	153	-0.361962	-1.56096	0.00566572	0.0368996
V$CEBP_Q2	142	-0.371412	-1.55889	0.00137174	0.0371847
CAGCTG_V$AP4_Q5	936	-0.311681	-1.55793	0	0.0369729
V$TEF1_Q6	147	-0.367351	-1.55568	0.0085592	0.0372622
V$AP1_C	182	-0.356362	-1.54326	0.0027933	0.041881
RGAGGAARY_V$PU1_Q6	320	-0.330148	-1.54137	0	0.0421256
V$AP2GAMMA_01	164	-0.357389	-1.53996	0.00139082	0.0422772
V$AREB6_03	154	-0.355733	-1.53727	0.00140845	0.0429139
CTAWWWATA_V$RSRFC4_Q2	213	-0.345652	-1.53628	0.00137174	0.0427981
V$ETS2_B	177	-0.352386	-1.53573	0	0.0424789
V$ETS_Q4	160	-0.362132	-1.5342	0.00142653	0.0426377
V$P53_DECAMER_Q2	164	-0.354091	-1.53123	0	0.0434433
V$MZF1_01	156	-0.357075	-1.53106	0.00421941	0.0430222
V$ZIC3_01	164	-0.352999	-1.53005	0.00556328	0.042952
TGCCAAR_V$NF1_Q6	432	-0.32081	-1.52687	0	0.043848
CATTGTYY_V$SOX9_B1	239	-0.340333	-1.52422	0.00126103	0.0445837
V$CEBP_01	162	-0.353503	-1.52224	0.00426136	0.0450511
V$S8_01	142	-0.359994	-1.51869	0.00698324	0.0463379
V$OCT1_Q6	160	-0.349856	-1.51444	0.00815217	0.0480502
V$IK2_01	172	-0.346949	-1.51386	0.00688705	0.0478408
V$OCT1_B	165	-0.352165	-1.51184	0.0055788	0.0482351
V$POU6F1_01	132	-0.365725	-1.51173	0.00808625	0.0477811
V$AREB6_01	159	-0.352252	-1.50604	0.00540541	0.0501
V$MEF2_01	87	-0.38244	-1.5052	0.022831	0.0500839
V$LFA1_Q6	162	-0.350281	-1.50472	0.00286944	0.0498648
V$CIZ_01	141	-0.356165	-1.503	0.00557103	0.0502712
V$AP4_Q6_01	163	-0.347207	-1.50281	0.00408719	0.0498528
TGASTMAGC_V$NFE2_01	136	-0.354692	-1.50266	0.00701262	0.0494738
V$AML_Q6	163	-0.346017	-1.5025	0.00282087	0.0491594
V$NFE2_01	177	-0.343738	-1.50203	0.00951087	0.0489561
V$CEBPDELTA_Q6	153	-0.350888	-1.50185	0.0071736	0.0486291
V$NFAT_Q4_01	168	-0.345928	-1.50028	0.00548697	0.0490283
V$MTF1_Q4	165	-0.350738	-1.49983	0.00831025	0.0488765
YNTTTNNNANGCARM_UNKNOWN	37	-0.442337	-1.49869	0.0401284	0.0491001
TATAAA_V$TATA_01	734	-0.303968	-1.49789	0	0.0489509
CTGCAGY_UNKNOWN	469	-0.313763	-1.49717	0	0.0489455
V$PTF1BETA_Q6	146	-0.353891	-1.49517	0.0141643	0.0494922
TTCYNRGAA_V$STAT5B_01	204	-0.336306	-1.49262	0.00269542	0.0501546
TTANTCA_UNKNOWN	532	-0.306596	-1.49113	0	0.0505295
YRCCAKNNGNCGC_UNKNOWN	48	-0.424987	-1.49025	0.0348485	0.0504797
V$PAX4_04	130	-0.358954	-1.48929	0.00973574	0.0504831
V$FXR_Q3	65	-0.396526	-1.48105	0.0339506	0.0547276
V$CEBPB_01	163	-0.345115	-1.47588	0.00681199	0.0572693
V$CART1_01	133	-0.352285	-1.47555	0.0141044	0.0569471
V$E12_Q6	162	-0.33764	-1.47279	0.0082531	0.0580413
YTAATTAA_V$LHX3_01	108	-0.361035	-1.47097	0.0165663	0.0587294
V$COREBINDINGFACTOR_Q6	166	-0.340716	-1.47078	0.0111576	0.0583756
V$PPARA_02	86	-0.375608	-1.46835	0.0105105	0.0592669
V$OCT_Q6	167	-0.33671	-1.46229	0.00851064	0.062024
V$GR_01	118	-0.350502	-1.46007	0.0168539	0.0627425
V$LMO2COM_01	161	-0.343796	-1.45824	0.00555556	0.0633758
V$MYOD_Q6_01	156	-0.343106	-1.45812	0.00727802	0.0629468
TTGCWCAAY_V$CEBPB_02	45	-0.416628	-1.4522	0.0484375	0.066147
V$NF1_Q6_01	167	-0.339432	-1.44988	0.0153203	0.0668803
V$EGR2_01	118	-0.354789	-1.44492	0.0204678	0.0696421
CAGNWMCNNNGAC_UNKNOWN	48	-0.406575	-1.44261	0.044586	0.0707462
V$ARP1_01	102	-0.355778	-1.44138	0.0231884	0.0710397
V$TAL1BETAE47_01	145	-0.334705	-1.43799	0.0126939	0.0727071
V$OCT1_Q5_01	164	-0.333019	-1.43652	0.0111111	0.0731739
V$SOX9_B1	163	-0.329854	-1.4333	0.00863309	0.0749054
RACCACAR_V$AML_Q6	158	-0.335485	-1.42926	0.0083682	0.0773864
V$LYF1_01	163	-0.326109	-1.42448	0.0196353	0.0802939
V$E47_01	168	-0.331172	-1.423	0.0165975	0.080931
V$EGR1_01	162	-0.332332	-1.42244	0.0213904	0.0807318
YNGTTNNNATT_UNKNOWN	219	-0.31896	-1.42032	0.00942126	0.0816753
V$E47_02	145	-0.339582	-1.41654	0.0165975	0.0839766
TAATTA_V$CHX10_01	474	-0.295862	-1.41621	0.00118906	0.0836833
RNTCANNRNNYNATTW_UNKNOWN	30	-0.43994	-1.41558	0.0750408	0.0836033
V$TFIII_Q6	144	-0.336409	-1.41364	0.0181058	0.0844183
V$OCT1_05	155	-0.3298	-1.41349	0.022695	0.083995
V$AP4_Q5	176	-0.322183	-1.41339	0.0178817	0.083513
CAGGTA_V$AREB6_01	469	-0.293947	-1.41216	0.00241838	0.0840563
V$NKX25_02	149	-0.335496	-1.41144	0.0181818	0.0840808
GGGYGTGNY_UNKNOWN	423	-0.295604	-1.41088	0	0.0840068
V$ROAZ_01	10	-0.592365	-1.40738	0.0915619	0.0862613
V$DR1_Q3	156	-0.331182	-1.40658	0.0134771	0.0863681
TTGTTT_V$FOXO4_01	1205	-0.277431	-1.40537	0	0.0866588
V$PAX4_03	166	-0.327387	-1.40505	0.0204638	0.0863313
V$FOXO4_02	159	-0.328567	-1.40213	0.0136986	0.0881185
AACTTT_UNKNOWN	1161	-0.278081	-1.40209	0	0.0875941
GTGGGTGK_UNKNOWN	182	-0.323603	-1.40158	0.0186418	0.0874889
V$ER_Q6_02	166	-0.327441	-1.4004	0.0183099	0.0878966
ACCTGTTG_UNKNOWN	96	-0.352047	-1.3987	0.0268741	0.0887563
V$MYOD_Q6	154	-0.328146	-1.39724	0.0256757	0.0893682
V$FREAC2_01	159	-0.32867	-1.39438	0.0174966	0.0915385
V$CREB_Q2	170	-0.320294	-1.39367	0.0165062	0.0915495
V$HEN1_01	133	-0.330591	-1.38982	0.031339	0.093996
V$TFIIA_Q6	175	-0.315907	-1.38869	0.0201884	0.0942998
V$TAL1ALPHAE47_01	148	-0.327155	-1.38808	0.023743	0.0941795
CTTTGA_V$LEF1_Q2	692	-0.28194	-1.38659	0	0.0950051
V$OCT1_02	133	-0.330808	-1.38383	0.0201149	0.0970383
V$AML1_01	159	-0.319422	-1.38295	0.0293296	0.0971654
RAAGNYNNCTTY_UNKNOWN	72	-0.364237	-1.38103	0.0707692	0.0984033
V$SP1_Q2_01	165	-0.32279	-1.38011	0.0136426	0.0986671
V$NERF_Q2	161	-0.320858	-1.37892	0.0222841	0.0993396
V$TEF_Q6	159	-0.321947	-1.37884	0.0178571	0.0988116
V$PU1_Q6	151	-0.323031	-1.37844	0.025	0.0986723
V$STAT6_02	157	-0.319018	-1.37834	0.0247813	0.098201
V$IK1_01	165	-0.321852	-1.37806	0.0295359	0.0979343
V$AP2_Q3	174	-0.317467	-1.37573	0.0236111	0.0995274
V$TITF1_Q3	141	-0.324165	-1.37541	0.0368794	0.0992757
V$OCT1_03	131	-0.331387	-1.37512	0.0334302	0.0989688
V$SP1_01	164	-0.316712	-1.3741	0.022069	0.0993554
V$ZIC2_01	162	-0.31749	-1.37376	0.0235784	0.0991148
V$ETS1_B	165	-0.316331	-1.37318	0.0236842	0.0990226
V$HNF3_Q6	118	-0.330957	-1.37001	0.0410765	0.101327
V$OSF2_Q6	160	-0.318893	-1.36962	0.0271739	0.101092
V$MYOGENIN_Q6	161	-0.316346	-1.36848	0.0248963	0.101786
V$CEBPB_02	167	-0.314324	-1.36712	0.0273224	0.102503
CATRRAGC_UNKNOWN	75	-0.358117	-1.36676	0.0645161	0.102264
GCTNWTTGK_UNKNOWN	185	-0.30951	-1.35935	0.029932	0.108699
V$STAT_01	173	-0.314073	-1.35919	0.0274725	0.108321
RNGTGGGC_UNKNOWN	469	-0.283406	-1.35826	0.0059453	0.108621
V$AML1_Q6	159	-0.319422	-1.35109	0.0381992	0.11478
V$HNF4_DR1_Q3	160	-0.317076	-1.35096	0.038874	0.114352
CTGYNNCTYTAA_UNKNOWN	46	-0.397061	-1.35057	0.0889894	0.11411
V$SREBP1_Q6	168	-0.310708	-1.34434	0.0328767	0.119824
V$OCT_C	163	-0.313015	-1.34366	0.0316369	0.119819
V$STAT1_01	40	-0.397812	-1.3429	0.111811	0.119901
V$RSRFC4_01	148	-0.316128	-1.34185	0.0364656	0.120379
V$FAC1_01	136	-0.316756	-1.34055	0.0374251	0.121152
V$LEF1_Q2	137	-0.317364	-1.33885	0.0527778	0.122306
V$ZIC1_01	161	-0.311716	-1.33808	0.0359521	0.122435
V$STAT3_01	13	-0.510054	-1.33803	0.13438	0.12193
V$FOXO1_01	157	-0.311543	-1.33735	0.0356164	0.122119
YAATNRNNNYNATT_UNKNOWN	61	-0.357231	-1.33327	0.0818182	0.125689
V$IRF1_Q6	157	-0.312945	-1.33085	0.035868	0.12778
V$HNF1_01	121	-0.321404	-1.32862	0.0562588	0.12943
V$EVI1_04	138	-0.317003	-1.32662	0.0617111	0.13093
V$CDPCR3_01	27	-0.425813	-1.32539	0.121113	0.131682
V$PPAR_DR1_Q2	158	-0.311031	-1.32441	0.0559541	0.132188
V$SREBP1_02	55	-0.368968	-1.32264	0.1088	0.133652
V$RSRFC4_Q2	128	-0.317976	-1.32039	0.0548523	0.135556
WYAAANNRNNNGCG_UNKNOWN	32	-0.409912	-1.31779	0.13738	0.138098
AGCYRWTTC_UNKNOWN	61	-0.354039	-1.31633	0.100457	0.139132
WWTAAGGC_UNKNOWN	90	-0.33321	-1.31531	0.075643	0.139493
V$LHX3_01	130	-0.316381	-1.31467	0.057971	0.139657
V$IK3_01	139	-0.310189	-1.31292	0.0482955	0.140922
V$TCF11_01	141	-0.310857	-1.31161	0.0520394	0.141886
V$NKX22_01	107	-0.322005	-1.3104	0.0687679	0.142687
V$FOXO3_01	149	-0.309556	-1.30893	0.0589849	0.143649
V$P53_02	159	-0.302625	-1.30862	0.05	0.14335
V$MYOD_01	149	-0.307719	-1.30711	0.0571031	0.14442
V$USF_C	178	-0.300084	-1.30637	0.042292	0.144867
V$VDR_Q3	152	-0.308787	-1.30629	0.0550964	0.144299
V$SP1_Q6_01	150	-0.306272	-1.30609	0.0598886	0.143893
V$HMGIY_Q6	144	-0.309607	-1.30512	0.0568655	0.144459
V$HNF3ALPHA_Q6	135	-0.310642	-1.305	0.0668563	0.143982
V$MYB_Q5_01	155	-0.307614	-1.30484	0.0620491	0.143585
V$FOXD3_01	136	-0.308492	-1.30475	0.0721358	0.14305
V$LXR_Q3	44	-0.374508	-1.30391	0.0940989	0.143509
V$FOXO4_01	143	-0.309268	-1.30323	0.0681818	0.143748
V$HTF_01	45	-0.380072	-1.30046	0.112721	0.146473
V$IPF1_Q4	135	-0.311619	-1.30033	0.0494186	0.146007
V$AREB6_02	157	-0.302802	-1.29552	0.0623269	0.151097
CCANNAGRKGGC_UNKNOWN	76	-0.339228	-1.29344	0.104258	0.152861
V$ZF5_01	161	-0.302639	-1.29307	0.0480769	0.152658
TGTTTGY_V$HNF3_Q6	443	-0.267578	-1.29192	0.0109489	0.15345
V$STAT1_03	152	-0.306534	-1.29132	0.0502092	0.153529
AAAYWAACM_V$HFH4_01	162	-0.300227	-1.2906	0.0736698	0.153598
V$FOXO1_02	149	-0.303711	-1.28936	0.0650069	0.1543
V$STAT_Q6	157	-0.302365	-1.28536	0.0713267	0.158586
CCAATNNSNNNGCG_UNKNOWN	40	-0.383023	-1.28511	0.133333	0.158231
CTTTGT_V$LEF1_Q2	1217	-0.255016	-1.28322	0.00105708	0.159817
TGANNYRGCA_V$TCF11MAFG_01	185	-0.29009	-1.27972	0.0658602	0.163362
V$GATA6_01	134	-0.301392	-1.27961	0.0782123	0.162782
V$HMX1_01	27	-0.412066	-1.27792	0.153713	0.164429
V$NGFIC_01	148	-0.296471	-1.27697	0.0689655	0.165076
V$NKX62_Q2	140	-0.304725	-1.27411	0.0656205	0.168337
V$POU3F2_02	160	-0.294606	-1.27343	0.0859155	0.168433
V$PR_02	84	-0.323126	-1.27293	0.110613	0.168492
V$CRX_Q4	169	-0.29487	-1.26795	0.0723404	0.174287
V$SMAD3_Q6	153	-0.297762	-1.26554	0.0748201	0.176846
V$FOXM1_01	146	-0.300797	-1.26551	0.0847222	0.176189
RRAGTTGT_UNKNOWN	154	-0.296806	-1.26506	0.0716253	0.176117
V$MEIS1_01	143	-0.298033	-1.26506	0.0849478	0.175435
CCTNTMAGA_UNKNOWN	80	-0.327971	-1.26232	0.127246	0.178399
V$ATF_01	169	-0.288544	-1.2596	0.0693481	0.181533
V$OCT1_01	163	-0.290384	-1.25859	0.0982503	0.182217
V$AP4_01	164	-0.289804	-1.2579	0.0662162	0.182664
GGCNNMSMYNTTG_UNKNOWN	49	-0.359873	-1.25784	0.161442	0.182024
V$NF1_Q6	180	-0.288005	-1.25734	0.0840108	0.18198
GGARNTKYCCA_UNKNOWN	51	-0.350755	-1.25695	0.1563	0.181856
V$MYB_Q3	146	-0.293917	-1.2564	0.0902778	0.181922
V$PBX1_01	155	-0.295527	-1.2563	0.0834473	0.181349
V$HOXA4_Q2	163	-0.292691	-1.25522	0.0727273	0.182281
V$OLF1_01	179	-0.29018	-1.25515	0.0852503	0.181675
V$HFH8_01	132	-0.300019	-1.25462	0.100583	0.181721
TTCYRGAA_UNKNOWN	184	-0.287804	-1.25327	0.0804911	0.182961
V$LBP1_Q6	135	-0.29681	-1.25311	0.0806223	0.182509
V$MAF_Q6	171	-0.290114	-1.25049	0.0983379	0.185392
V$HNF3B_01	136	-0.297114	-1.25006	0.0948905	0.185302
V$MEF2_02	136	-0.299077	-1.24974	0.11855	0.185041
V$MYCMAX_B	159	-0.293463	-1.2486	0.090535	0.185919
V$OCT1_04	147	-0.294827	-1.24849	0.101156	0.185399
V$AP2_Q6_01	163	-0.292272	-1.24777	0.0831025	0.185748
V$PR_Q2	155	-0.293291	-1.24769	0.0981767	0.185168
V$AR_01	92	-0.309602	-1.24569	0.133433	0.187327
TAAWWATAG_V$RSRFC4_Q2	96	-0.30917	-1.24568	0.128492	0.186666
V$CP2_01	160	-0.292073	-1.24458	0.0998613	0.187532
V$MYOGNF1_01	38	-0.369492	-1.2442	0.164763	0.187373
V$MAZR_01	147	-0.293594	-1.24047	0.109705	0.192034
V$E4F1_Q6	175	-0.286642	-1.2388	0.0948617	0.193642
V$AP3_Q6	158	-0.286895	-1.23603	0.085044	0.197177
V$TAL1BETAITF2_01	150	-0.290641	-1.23256	0.114754	0.20173
V$MEF2_Q6_01	148	-0.289298	-1.23181	0.112175	0.202091
V$COUP_DR1_Q6	155	-0.287766	-1.23098	0.115942	0.202468
V$HAND1E47_01	158	-0.288036	-1.22801	0.112813	0.206414
V$HP1SITEFACTOR_Q6	139	-0.290121	-1.22512	0.112656	0.209946
V$TBP_01	142	-0.290604	-1.22367	0.114365	0.211444
V$CREB_Q4	161	-0.282124	-1.22309	0.111268	0.211531
RTTTNNNYTGGM_UNKNOWN	100	-0.302323	-1.21751	0.14759	0.219531
V$ZF5_B	158	-0.286466	-1.21587	0.126241	0.221341
V$NKX61_01	130	-0.28532	-1.21343	0.131148	0.224478
V$PAX5_02	11	-0.497171	-1.21326	0.247253	0.223979
V$AHRARNT_01	82	-0.312939	-1.21142	0.158519	0.226238
V$SMAD_Q6	161	-0.279052	-1.20506	0.138927	0.235644
V$HNF1_Q6	129	-0.290057	-1.20449	0.123288	0.235789
V$NKX3A_01	122	-0.28793	-1.20067	0.157819	0.241508
YATGNWAAT_V$OCT_C	231	-0.266948	-1.19983	0.114754	0.242112
V$USF_Q6_01	145	-0.280948	-1.19413	0.15461	0.25124
MYAATNNNNNNNGGC_UNKNOWN	81	-0.306439	-1.19392	0.184132	0.250759
RYTAAWNNNTGAY_UNKNOWN	40	-0.349914	-1.19265	0.209192	0.252142
WGTTNNNNNAAA_UNKNOWN	344	-0.256593	-1.19206	0.0975919	0.252346
RGAANNTTC_V$HSF1_01	261	-0.263983	-1.19108	0.111402	0.253247
TGACAGNY_V$MEIS1_01	505	-0.245984	-1.18964	0.0810489	0.255012
V$GR_Q6	172	-0.273161	-1.18704	0.120332	0.258797
V$MMEF2_Q6	159	-0.275937	-1.18534	0.143448	0.26106
V$CREBP1_Q2	155	-0.275918	-1.1852	0.170455	0.260415
V$HFH4_01	123	-0.286845	-1.18497	0.156716	0.26003
RYAAAKNNNNNNTTGW_UNKNOWN	56	-0.3275	-1.18379	0.202473	0.261234
V$GATA2_01	72	-0.312664	-1.18244	0.192248	0.262819
V$AR_Q2	75	-0.310504	-1.18135	0.189759	0.263934
V$HOX13_01	26	-0.382157	-1.18094	0.243822	0.263817
V$SPZ1_01	163	-0.274941	-1.18064	0.157593	0.263444
V$COMP1_01	69	-0.310878	-1.17878	0.211852	0.265844
V$ER_Q6_01	170	-0.274121	-1.17676	0.158114	0.268748
V$OCT1_06	160	-0.27383	-1.1765	0.170501	0.268376
V$VDR_Q6	155	-0.274385	-1.17457	0.166432	0.270953
V$MYB_Q6	154	-0.275745	-1.17441	0.17415	0.270416
V$XBP1_01	85	-0.302838	-1.17431	0.215318	0.269729
V$CEBPA_01	151	-0.277485	-1.17388	0.167376	0.269691
V$MSX1_01	114	-0.286978	-1.17119	0.196884	0.273817
V$T3R_Q6	159	-0.273552	-1.16918	0.16156	0.276703
TGATTTRY_V$GFI1_01	188	-0.266283	-1.16753	0.15747	0.278849
V$CDPCR3HD_01	154	-0.273961	-1.16281	0.182961	0.286862
YGTCCTTGR_UNKNOWN	63	-0.310142	-1.16228	0.224924	0.286961
V$COUP_01	164	-0.266988	-1.15979	0.18255	0.290765
TGACATY_UNKNOWN	389	-0.245753	-1.15631	0.140097	0.296341
V$STAT4_01	148	-0.274433	-1.1556	0.196862	0.296889
V$GNCF_01	47	-0.32813	-1.15116	0.273312	0.304694
V$RFX1_01	148	-0.27026	-1.15015	0.201102	0.305875
WTTGKCTG_UNKNOWN	317	-0.247195	-1.14565	0.150376	0.313924
AAAYRNCTG_UNKNOWN	233	-0.256389	-1.14477	0.175711	0.314657
TGAYRTCA_V$ATF3_Q6	332	-0.245498	-1.14315	0.15602	0.316959
V$LMO2COM_02	154	-0.270356	-1.14222	0.207182	0.317954
V$PAX4_02	147	-0.267516	-1.14221	0.207681	0.317025
V$CACBINDINGPROTEIN_Q6	155	-0.268605	-1.14176	0.200843	0.317005
V$HNF4_01	165	-0.263278	-1.13597	0.199434	0.327967
V$MYCMAX_02	166	-0.260072	-1.13559	0.214381	0.327849
V$HSF_Q6	113	-0.278996	-1.13266	0.237956	0.332709
V$ATF3_Q6	167	-0.262937	-1.13166	0.219101	0.333686
V$HFH3_01	114	-0.276198	-1.12648	0.238304	0.343811
V$ATF4_Q2	156	-0.260581	-1.12499	0.219613	0.346051
V$CDC5_01	167	-0.259834	-1.12398	0.207977	0.347263
TAAYNRNNTCC_UNKNOWN	95	-0.283623	-1.12237	0.240122	0.349714
V$DR4_Q2	155	-0.26058	-1.11707	0.252125	0.360233
V$DR3_Q4	81	-0.289643	-1.11681	0.262195	0.359785
YYCATTCAWW_UNKNOWN	123	-0.27098	-1.11523	0.25107	0.362464
V$HSF1_01	152	-0.26306	-1.1145	0.243281	0.363176
V$NRF2_Q4	170	-0.257841	-1.1142	0.237171	0.362821
V$P300_01	158	-0.261296	-1.11411	0.23487	0.36198
V$FOXJ2_02	134	-0.266625	-1.11376	0.263587	0.361668
V$CHX10_01	148	-0.261299	-1.11278	0.256738	0.362879
V$CP2_02	149	-0.259903	-1.11222	0.247911	0.363003
V$GATA1_03	156	-0.258688	-1.11167	0.249657	0.363212
V$HFH1_01	151	-0.259226	-1.11135	0.24343	0.362886
RNCTGNYNRNCTGNY_UNKNOWN	46	-0.31724	-1.11038	0.305643	0.363964
V$HNF1_C	122	-0.266359	-1.1087	0.263314	0.36673
TTANWNANTGGM_UNKNOWN	36	-0.33484	-1.10311	0.289855	0.378167
V$HSF2_01	138	-0.256883	-1.10255	0.267544	0.378354
V$CDX2_Q5	148	-0.259757	-1.10147	0.275103	0.379719
SMTTTTGT_UNKNOWN	269	-0.243261	-1.10125	0.236671	0.379159
V$CEBP_Q2_01	169	-0.254098	-1.09899	0.276653	0.383443
V$SP3_Q3	160	-0.25466	-1.0986	0.26685	0.383304
GGGCGGR_V$SP1_Q6	1896	-0.214283	-1.09801	0.119219	0.383494
V$STAT5A_03	158	-0.25606	-1.09673	0.279102	0.385354
V$GATA4_Q3	145	-0.258904	-1.09388	0.29023	0.390772
V$MEIS1AHOXA9_01	74	-0.286165	-1.09256	0.309774	0.392722
V$NCX_01	92	-0.276381	-1.09142	0.286131	0.394297
V$AP2_Q6	172	-0.249247	-1.08782	0.280537	0.40147
V$STAT6_01	158	-0.251837	-1.08405	0.301408	0.409346
V$TCF4_Q5	142	-0.255676	-1.08271	0.321739	0.411273
V$LXR_DR4_Q3	52	-0.306089	-1.08176	0.341158	0.412541
V$HMEF2_Q6	80	-0.283686	-1.08	0.321101	0.415564
V$ALPHACP1_01	142	-0.256652	-1.07731	0.300836	0.420737
TTCNRGNNNNTTC_V$HSF_Q6	90	-0.275217	-1.0769	0.325893	0.420554
V$CREB_Q4_01	139	-0.261028	-1.07674	0.317483	0.419819
V$DBP_Q6	155	-0.250837	-1.07409	0.3206	0.425189
RGTTAMWNATT_V$HNF1_01	38	-0.318582	-1.06715	0.371476	0.440505
V$PAX5_01	96	-0.266276	-1.06587	0.347445	0.442476
V$ELK1_01	163	-0.246095	-1.06574	0.311901	0.441612
V$SRY_02	154	-0.249139	-1.06495	0.344687	0.442195
YTTCCNNNGGAMR_UNKNOWN	32	-0.330101	-1.06486	0.369458	0.441262
V$CREB_Q2_01	143	-0.250496	-1.06444	0.34464	0.44115
V$E2F1_Q3_01	163	-0.248396	-1.06384	0.330084	0.441458
V$EGR3_01	46	-0.304961	-1.06301	0.370861	0.442209
V$EFC_Q6	167	-0.248266	-1.06276	0.347885	0.441687
V$AHR_Q5	136	-0.254124	-1.06159	0.346705	0.443486
V$POU1F1_Q6	142	-0.248957	-1.06136	0.323782	0.442911
CCCNNNNNNAAGWT_UNKNOWN	67	-0.28162	-1.05959	0.336296	0.44601
V$ER_Q6	173	-0.243061	-1.05862	0.332886	0.447176
V$TTF1_Q6	154	-0.248361	-1.05555	0.342142	0.453259
V$HIF1_Q5	163	-0.245025	-1.05401	0.359332	0.455765
AACWWCAANK_UNKNOWN	83	-0.272594	-1.05196	0.378295	0.45958
V$PAX3_01	14	-0.401312	-1.05152	0.394415	0.459468
V$MIF1_01	101	-0.262062	-1.0515	0.359942	0.458391
V$PITX2_Q2	153	-0.244876	-1.04501	0.358904	0.47344
V$BRN2_01	141	-0.246489	-1.04473	0.355167	0.472914
YATTNATC_UNKNOWN	214	-0.232802	-1.04101	0.355731	0.481104
WCAANNNYCAG_UNKNOWN	160	-0.239952	-1.03897	0.37535	0.484952
V$ATF_B	129	-0.2476	-1.03406	0.409722	0.495974
TCANNTGAY_V$SREBP1_01	305	-0.225839	-1.033	0.379974	0.497428
GGCKCATGS_UNKNOWN	40	-0.301984	-1.02155	0.421667	0.525382
V$PR_01	78	-0.270063	-1.02033	0.428571	0.527212
YCATTAA_UNKNOWN	340	-0.218777	-1.01623	0.422414	0.536462
V$GATA1_01	151	-0.235885	-1.01474	0.411035	0.539018
V$GR_Q6_01	157	-0.235359	-1.01243	0.447222	0.54352
V$CEBPGAMMA_Q6	152	-0.237427	-1.00942	0.446453	0.549966
V$SRY_01	121	-0.246892	-1.0093	0.43994	0.548944
V$AR_03	35	-0.307456	-1.00646	0.446254	0.554955
V$WHN_B	161	-0.233367	-1.00356	0.45034	0.561416
V$LEF1_Q6	166	-0.231807	-1.00326	0.463612	0.560858
TGACGTCA_V$ATF3_Q6	153	-0.2312	-0.990339	0.48224	0.593541
V$TCF1P_Q6	150	-0.234562	-0.987676	0.496361	0.599138
V$SREBP_Q3	155	-0.231251	-0.985649	0.498615	0.603036
V$TCF11MAFG_01	130	-0.236952	-0.985465	0.481894	0.60206
V$NFY_C	148	-0.230714	-0.984021	0.479663	0.60446
V$CEBP_C	121	-0.234891	-0.981355	0.510608	0.610306
V$SP1_Q4_01	163	-0.22883	-0.980724	0.51046	0.610473
V$CDPCR1_01	78	-0.252216	-0.980483	0.505917	0.609654
AAGWWRNYGGC_UNKNOWN	78	-0.25335	-0.97281	0.519118	0.628732
V$GATA1_05	151	-0.226821	-0.970075	0.54023	0.63479
V$GCM_Q2	142	-0.227206	-0.968466	0.522175	0.637449
V$GATA1_04	140	-0.233777	-0.967293	0.526823	0.63903
V$EN1_01	64	-0.261813	-0.965333	0.524768	0.642865
V$GRE_C	81	-0.246971	-0.962793	0.518968	0.648036
V$FOX_Q2	133	-0.228668	-0.960746	0.544656	0.652074
V$MAZ_Q6	116	-0.231765	-0.958654	0.546961	0.656365
V$MZF1_02	150	-0.225403	-0.957813	0.53041	0.657054
ACAWYAAAG_UNKNOWN	64	-0.25869	-0.955221	0.529862	0.662338
YGCGYRCGC_UNKNOWN	191	-0.217195	-0.954413	0.546061	0.662899
V$GFI1_01	160	-0.223592	-0.953904	0.580556	0.662688
V$GATA_Q6	117	-0.230659	-0.95354	0.553997	0.662087
V$YY1_01	156	-0.222808	-0.953391	0.560056	0.660962
V$ZID_01	151	-0.223286	-0.950391	0.57377	0.667452
V$CREBP1_01	98	-0.238849	-0.948782	0.547864	0.670103
V$PBX1_02	92	-0.239894	-0.948624	0.560423	0.668992
V$FREAC7_01	115	-0.230304	-0.948067	0.553648	0.668928
TGACCTY_V$ERR1_Q2	670	-0.193348	-0.947638	0.651532	0.668493
V$HNF6_Q6	145	-0.221275	-0.94308	0.595775	0.678995
V$FXR_IR1_Q6	73	-0.246355	-0.9427	0.557576	0.678479
V$CDP_01	45	-0.269654	-0.935118	0.562295	0.696685
WTGAAAT_UNKNOWN	346	-0.197555	-0.928017	0.665427	0.713397
GGATTA_V$PITX2_Q2	362	-0.196875	-0.927105	0.6775	0.714016
CGTSACG_V$PAX3_B	90	-0.235679	-0.924495	0.602963	0.718924
V$STAT5A_02	85	-0.236926	-0.924169	0.589286	0.718214
V$HNF4_01_B	161	-0.21279	-0.919591	0.624152	0.728324
V$EGR_Q6	180	-0.210908	-0.91945	0.666216	0.727077
V$NFY_01	154	-0.214966	-0.914166	0.668539	0.738874
V$RORA2_01	87	-0.234634	-0.912536	0.616071	0.741458
V$STAT3_02	94	-0.232986	-0.910404	0.634036	0.745183
V$SP1_Q6	159	-0.211978	-0.909033	0.673943	0.746806
YKACATTT_UNKNOWN	180	-0.208338	-0.903455	0.696169	0.759245
V$PAX3_B	51	-0.253229	-0.901196	0.589661	0.763206
V$PAX2_02	165	-0.210044	-0.899882	0.687084	0.764655
V$USF_02	162	-0.208731	-0.899347	0.666667	0.764441
V$CREB_01	172	-0.207539	-0.896662	0.70604	0.769137
RYTGCNNRGNAAC_V$MIF1_01	48	-0.260664	-0.895378	0.647528	0.770594
V$PXR_Q2	164	-0.206443	-0.891334	0.726027	0.778607
V$NKX25_01	78	-0.229036	-0.890149	0.662669	0.779775
V$MYC_Q2	123	-0.215332	-0.889404	0.695775	0.779854
V$CREB_02	170	-0.207471	-0.88713	0.716418	0.783612
TGTYNNNNNRGCARM_UNKNOWN	38	-0.266383	-0.884544	0.646032	0.788036
V$AHR_01	45	-0.254436	-0.881157	0.662558	0.794485
V$MYCMAX_01	159	-0.20248	-0.870641	0.750677	0.817589
TCCATTKW_UNKNOWN	142	-0.207524	-0.867151	0.753825	0.823766
GGCNKCCATNK_UNKNOWN	74	-0.226631	-0.86664	0.706949	0.823159
YWATTWNNRGCT_UNKNOWN	43	-0.251497	-0.865409	0.666667	0.82423
V$NFY_Q6	151	-0.200292	-0.862212	0.789845	0.829506
V$AR_Q6	130	-0.206799	-0.861608	0.762641	0.829063
V$HIF1_Q3	153	-0.201123	-0.861376	0.778237	0.827804
RRCCGTTA_UNKNOWN	45	-0.249334	-0.85856	0.676519	0.83222
V$PAX4_01	170	-0.197638	-0.852055	0.799202	0.844404
CYTAGCAAY_UNKNOWN	82	-0.218095	-0.850335	0.731523	0.846223
V$ERR1_Q2	171	-0.197083	-0.847881	0.801913	0.849553
GGGNRMNNYCAT_UNKNOWN	54	-0.236755	-0.846178	0.727129	0.851216
MGGAAGTG_V$GABP_B	464	-0.175402	-0.842463	0.905502	0.856994
V$CREBP1CJUN_01	174	-0.191989	-0.840816	0.830369	0.8584
YGACNNYACAR_UNKNOWN	54	-0.231887	-0.838648	0.73752	0.860901
CCAWNWWNNNGGC_UNKNOWN	49	-0.234572	-0.835657	0.736246	0.864816
V$TST1_01	157	-0.192549	-0.832533	0.834239	0.869223
AACYNNNNTTCCS_UNKNOWN	64	-0.22242	-0.832267	0.757079	0.867966
V$AHRARNT_02	12	-0.328975	-0.825827	0.68	0.878606
V$OCT1_07	90	-0.208551	-0.822795	0.817771	0.882063
CCGNMNNTNACG_UNKNOWN	47	-0.234781	-0.822728	0.763371	0.880387
V$PAX6_01	58	-0.227935	-0.818019	0.768405	0.886986
SYATTGTG_UNKNOWN	141	-0.191158	-0.814515	0.857988	0.891278
RACTNNRTTTNC_UNKNOWN	79	-0.20617	-0.79591	0.842424	0.92028
V$MAX_01	168	-0.183137	-0.794878	0.902703	0.919935
V$TAXCREB_01	90	-0.20068	-0.794121	0.855882	0.919206
V$NFY_Q6_01	158	-0.185815	-0.782834	0.917127	0.933441
GTTNYYNNGGTNA_UNKNOWN	49	-0.215742	-0.780622	0.823809	0.934565
GTTRYCATRR_UNKNOWN	102	-0.190616	-0.77841	0.896047	0.935635
V$NMYC_01	175	-0.177689	-0.777645	0.932969	0.934735
CRGAARNNNNCGA_UNKNOWN	30	-0.246405	-0.777287	0.802653	0.933276
V$TAXCREB_02	18	-0.274404	-0.770081	0.79566	0.940331
V$STAT1_02	159	-0.177451	-0.769728	0.932692	0.93892
CCAWYNNGAAR_UNKNOWN	81	-0.195575	-0.764611	0.901034	0.943031
GAANYNYGACNY_UNKNOWN	45	-0.220418	-0.757207	0.857143	0.949429
V$TEL2_Q6	144	-0.180839	-0.757046	0.928969	0.947678
V$AR_02	26	-0.246622	-0.754063	0.808511	0.948937
GTGACGY_V$E4F1_Q6	409	-0.156339	-0.740599	0.99399	0.959559
CTCNANGTGNY_UNKNOWN	57	-0.202723	-0.738702	0.907348	0.95926
KMCATNNWGGA_UNKNOWN	53	-0.201564	-0.727153	0.895545	0.966663
V$ALX4_01	11	-0.295531	-0.722026	0.824818	0.968519
V$HNF4ALPHA_Q6	165	-0.162997	-0.706791	0.980636	0.97631
V$CDP_02	66	-0.185348	-0.682028	0.961479	0.98603
V$USF2_Q6	162	-0.159513	-0.681692	0.992898	0.984236
ACTWSNACTNY_UNKNOWN	53	-0.187971	-0.677923	0.935976	0.983743
V$PAX2_01	33	-0.202021	-0.654894	0.942584	0.988796
GGCNRNWCTTYS_UNKNOWN	47	-0.183128	-0.645364	0.972625	0.988925

## Sheet: Down in MetsTranscriptionFactor
Table S4F. Transcription factor target gene sets down-regulated in Mets
Gene Set	SIZE	ES	NES	NOM p-val	FDR q-val
KRCTCNNNNMANAGC_UNKNOWN	45	0.512646	1.97493	0	0.00786426
GKCGCNNNNNNNTGAYG_UNKNOWN	41	0.428152	1.61115	0.0147059	0.181992
TTTNNANAGCYR_UNKNOWN	95	0.359146	1.57927	0	0.163741
V$EVI1_03	31	0.441798	1.54598	0.0253165	0.162795
ACTAYRNNNCCCR_UNKNOWN	271	0.295981	1.53054	0	0.14978
V$ETF_Q6	62	0.374021	1.5053	0.0204082	0.15433
TMTCGCGANR_UNKNOWN	90	0.340703	1.49382	0.0151515	0.147403
V$ELK1_02	151	0.316114	1.49128	0.00746269	0.131769
TAANNYSGCG_UNKNOWN	48	0.374133	1.4477	0.0166667	0.173929
V$EVI1_05	98	0.322884	1.4368	0.0060423	0.172589
V$E2F_Q4	151	0.302163	1.42972	0	0.166756
V$E2F_Q6	150	0.302162	1.42047	0.00371747	0.166359
SCGGAAGY_V$ELK1_02	743	0.253223	1.39627	0	0.190273
V$E2F1_Q6	153	0.285619	1.36277	0.0171821	0.231234
V$E2F_01	48	0.357638	1.3612	0.0819209	0.218969
V$E2F_Q4_01	150	0.290564	1.35349	0.0108303	0.219745
V$FOXJ2_01	114	0.298806	1.34572	0.0378007	0.220709
GTTGNYNNRGNAAC_UNKNOWN	51	0.344406	1.34473	0.0707317	0.209764
V$E2F_02	150	0.28354	1.33073	0.0242215	0.221738
V$E2F1_Q4_01	143	0.27479	1.31231	0.0264026	0.245545
V$E2F1DP1_01	151	0.274228	1.31176	0.0310078	0.235057
V$E2F1DP2_01	151	0.274228	1.30712	0.0185185	0.232072
V$E2F4DP2_01	151	0.274228	1.29569	0.0348101	0.242751
V$E2F_Q3	145	0.273891	1.29536	0.0142857	0.233139
V$E2F1DP1RB_01	150	0.271978	1.29132	0.0395257	0.231926
V$PPARG_01	30	0.367921	1.27388	0.139303	0.256713
V$NFMUE1_Q6	161	0.266776	1.27248	0.0364963	0.249655
V$E2F1_Q6_01	159	0.263133	1.26501	0.0426229	0.254636
GCCATNTTG_V$YY1_Q6	261	0.247475	1.26329	0.0165289	0.24928
V$E2F4DP1_01	157	0.264081	1.2603	0.0657895	0.246975
V$E2F_Q3_01	147	0.261344	1.23517	0.0774411	0.290989
V$EVI1_02	68	0.295449	1.22359	0.140351	0.308334
V$E2F1_Q3	159	0.248647	1.19103	0.0970149	0.385236
SGCGSSAAA_V$E2F1DP2_01	110	0.26303	1.19054	0.126623	0.375212
GGAANCGGAANY_UNKNOWN	72	0.281433	1.16943	0.182099	0.426004
RYTGCNWTGGNR_UNKNOWN	67	0.279087	1.16031	0.19883	0.442825
V$HLF_01	150	0.243767	1.15701	0.15444	0.441386
V$E2F1_Q4	154	0.240974	1.15015	0.148289	0.451911
KCCGNSWTTT_UNKNOWN	66	0.273476	1.14143	0.216617	0.468943
V$E2F_Q6_01	140	0.243886	1.14014	0.176056	0.462064
V$CEBP_Q3	158	0.238488	1.1379	0.172794	0.458778
ATGGYGGA_UNKNOWN	61	0.280546	1.13269	0.239554	0.464553
ATCMNTCCGY_UNKNOWN	33	0.312648	1.12987	0.262774	0.462681
V$E2F_03	149	0.234886	1.12665	0.181159	0.462714
V$POU3F2_01	59	0.275271	1.12504	0.218462	0.457655
V$SOX5_01	159	0.232294	1.1189	0.189286	0.467518
GCGSCMNTTT_UNKNOWN	41	0.297469	1.11569	0.268156	0.467436
YRTCANNRCGC_UNKNOWN	45	0.296465	1.11437	0.243094	0.461586
V$EVI1_06	17	0.375745	1.11068	0.31829	0.464133
MCAATNNNNNGCG_UNKNOWN	53	0.269499	1.06522	0.325069	0.618053
V$RORA1_01	152	0.224034	1.06269	0.291391	0.615881
V$NRF1_Q6	134	0.224932	1.06215	0.308219	0.606283
V$GABP_B	152	0.222007	1.06055	0.294737	0.6009
TCCCRNNRTGC_UNKNOWN	119	0.231102	1.05629	0.330303	0.607025
TGCGCANK_UNKNOWN	306	0.205921	1.05284	0.313364	0.608873
TTAYRTAA_V$E4BP4_01	149	0.216764	1.03787	0.363985	0.656863
V$E2F_Q2	111	0.229492	1.03038	0.344051	0.676491
V$ARNT_02	161	0.21144	1.00999	0.409091	0.750745
SNACANNNYSYAGA_UNKNOWN	48	0.261492	1.00473	0.446809	0.760949
V$RFX1_02	153	0.209148	1.00345	0.402214	0.754153
V$NRF2_01	153	0.208746	0.998363	0.463087	0.763248
RCGCANGCGY_V$NRF1_Q6	531	0.183195	0.996219	0.524823	0.759506
GATAAGR_V$GATA_C	172	0.200348	0.985518	0.492958	0.792426
YTCCCRNNAGGY_UNKNOWN	50	0.252564	0.978558	0.507123	0.810033
V$YY1_Q6	147	0.209372	0.975704	0.537671	0.809752
V$E4BP4_01	126	0.212231	0.974505	0.510135	0.802408
V$USF_01	163	0.200487	0.966408	0.557143	0.822736
V$STAT5A_04	103	0.212804	0.943472	0.587413	0.904869
V$GATA_C	154	0.197097	0.941184	0.629091	0.901433
GTCNYYATGR_UNKNOWN	64	0.227982	0.936492	0.559006	0.907127
GCGNNANTTCC_UNKNOWN	80	0.217134	0.933813	0.621451	0.904645
GATTGGY_V$NFY_Q6_01	711	0.167117	0.926028	0.834646	0.922032
GGAMTNNNNNTCCY_UNKNOWN	78	0.217449	0.925499	0.646199	0.91128
V$ARNT_01	162	0.191464	0.923465	0.687075	0.906315
KTGGYRSGAA_UNKNOWN	46	0.242734	0.923017	0.568	0.895855
V$CREB_Q3	158	0.193921	0.922545	0.681481	0.885607
V$MYCMAX_03	163	0.190449	0.905634	0.767025	0.933196
V$YY1_02	145	0.191537	0.905613	0.70946	0.921319
V$TGIF_01	145	0.193735	0.899666	0.719178	0.928767
CAGNYGKNAAA_UNKNOWN	43	0.235051	0.888975	0.652174	0.950517
V$PAX8_B	62	0.219902	0.888353	0.690027	0.940836
WCTCNATGGY_UNKNOWN	47	0.230683	0.886124	0.669444	0.936145
V$PPARA_01	25	0.267702	0.883601	0.647465	0.931873
V$CMYB_01	154	0.187113	0.882058	0.79927	0.924983
V$MEIS1BHOXA9_01	81	0.207106	0.880023	0.723647	0.920025
YAATNANRNNNCAG_UNKNOWN	33	0.238325	0.847072	0.729167	0.990262
CGGAARNGGCNG_UNKNOWN	31	0.239851	0.825997	0.726582	1
V$GATA1_02	147	0.17081	0.807788	0.938849	1
CACGTG_V$MYC_Q2	640	0.145791	0.805922	0.990099	1
TNCATNTCCYR_UNKNOWN	80	0.181283	0.763414	0.949296	1
V$SREBP1_01	119	0.163854	0.753394	0.957187	1
V$SF1_Q6	161	0.156875	0.740566	0.989399	1
YGCANTGCR_UNKNOWN	76	0.173414	0.737184	0.948276	1
V$CETS1P54_01	165	0.143601	0.704244	0.996416	1
TGACCTTG_V$SF1_Q6	164	0.140943	0.671565	0.99635	1
GATGKMRGCG_UNKNOWN	42	0.177912	0.666632	0.944591	1
ACAWNRNSRCGG_UNKNOWN	44	0.175295	0.651717	0.964674	1
V$PAX8_01	21	0.207554	0.645952	0.928395	1
V$ATF6_01	75	0.145376	0.611816	0.990964	1
V$USF_Q6	161	0.125705	0.601178	1	1
V$MEF2_04	11	0.211547	0.56029	0.965909	1
V$HOXA3_01	10	0.219265	0.560065	0.950673	0.997826
