# Supplementary material for: Expression Profiling of Primary and Metastatic Ovarian Tumors Reveals Differences Indicative of Aggressive Disease
Source: PLoS One. 2014 Apr 14;9(4):e94476. doi: 10.1371/journal.pone.0094476 (PMC3986100; doi:10.1371/journal.pone.0094476)
Supplement: Table S5 — Percent cancer cells with positive Ki-67 and TUNEL staining. (XLSX) [file pone.0094476.s009.xlsx]

## Sheet: Sheet1
Table S5. Percent cancer cells with positive Ki-67 and TUNEL staining.
	Primary	Metastases	Primary Tumors	Metastases
Case Number	Percent Cancer Cells Ki-67	Percent Cancer Cells Ki-67	Percent TUNEL	Percent TUNEL
1	80	90
2	30	50
3	90	90
4	20	70	16.8	1.8
5	60	80	4.3	1.7
6	50	70	2.8	1.2
7	90	80	8.7	2.5
8	50	80	2.5	1.4
9	30	50	0.6	0.6
10	30	50	1.6	7.7
11	80	70	2.6	0.8
12	30	30	0.5	0.04
13	80	90	16.3	0.2
14	40	50	1.7	0.9
15	30	60	1.2	0.7
16	20	50	1.6	0.5
17	80	60	0.76	2.6
18	40	30
19	40	30	9.8	1.5
